# Supplementary material for: A French Value Set for the EQ-5D-5L
Source: PubMed Central journal article supplement — Pharmacoeconomics. 2020 Jan 8;38(4):413–25. doi: 10.1007/s40273-019-00876-4 (PMC7080328; doi:10.1007/s40273-019-00876-4), 2020-01-08
Supplement: 40273_2019_876_MOESM4_ESM.pdf [file 40273_2019_876_MOESM4_ESM.pdf]

ESM 4- List of declared health states by respondents

## Pharmacoeconomics

### A French value set for the EQ-5D-5L

Luiz Flavio Andrade<sup>1</sup>, Kristina Ludwig<sup>2</sup>, Juan Manuel Ramos Goni<sup>3</sup>,  
Mark Oppe<sup>3</sup>, Gérard de Pouvourville<sup>1</sup>.

1. Essec Business School, 3, Avenue Bernard Hirsch, CS 50105, Cergy Pontoise, France
2. Euroqol Research Foundation, Marten Meesweg 107, 3068 AV Rotterdam, the Netherlands
3. Axentiva Solutions, Calle Calvario, 271 - 1 B, Tacoronte 38340 Tenerife, Spain

Corresponding author:  
Gérard de Pouvourville  
[pouvourville@essec.edu](mailto:pouvourville@essec.edu)  
+33614491267

| NB | Var 5L   | Perct | Cum   |
|----|----------|-------|-------|
|    | 1 11111  | 24.58 | 24.58 |
|    | 2 11112  | 6.91  | 31.5  |
|    | 3 11113  | 2.1   | 33.6  |
|    | 4 11114  | 0.26  | 33.86 |
|    | 5 11121  | 16.27 | 50.13 |
|    | 6 11122  | 7.87  | 58.01 |
|    | 7 11123  | 2.27  | 60.28 |
|    | 8 11124  | 0.26  | 60.54 |
|    | 9 11125  | 0.09  | 60.63 |
|    | 10 11131 | 5.07  | 65.7  |
|    | 11 11132 | 3.32  | 69.03 |
|    | 12 11133 | 1.14  | 70.17 |
|    | 13 11134 | 0.35  | 70.52 |
|    | 14 11141 | 0.79  | 71.3  |
|    | 15 11142 | 0.44  | 71.74 |
|    | 16 11143 | 0.26  | 72    |
|    | 17 11151 | 0.09  | 72.09 |
|    | 18 11152 | 0.09  | 72.18 |
|    | 19 11211 | 0.44  | 72.62 |
|    | 20 11213 | 0.17  | 72.79 |
|    | 21 11214 | 0.09  | 72.88 |
|    | 22 11221 | 0.52  | 73.4  |
|    | 23 11222 | 0.52  | 73.93 |
|    | 24 11223 | 0.44  | 74.37 |
|    | 25 11231 | 0.52  | 74.89 |
|    | 26 11232 | 0.44  | 75.33 |
|    | 27 11233 | 0.35  | 75.68 |
|    | 28 11234 | 0.17  | 75.85 |
|    | 29 11241 | 0.17  | 76.03 |
|    | 30 11244 | 0.09  | 76.12 |
|    | 31 11321 | 0.09  | 76.2  |
|    | 32 11325 | 0.09  | 76.29 |
|    | 33 11331 | 0.09  | 76.38 |
|    | 34 11332 | 0.26  | 76.64 |
|    | 35 11333 | 0.09  | 76.73 |
|    | 36 11341 | 0.09  | 76.82 |
|    | 37 11344 | 0.09  | 76.9  |
|    | 38 11434 | 0.09  | 76.99 |
|    | 39 11435 | 0.09  | 77.08 |
|    | 40 11441 | 0.09  | 77.17 |
|    | 41 12121 | 0.09  | 77.25 |
|    | 42 12132 | 0.09  | 77.34 |
|    | 43 12222 | 0.09  | 77.43 |
|    | 44 12224 | 0.09  | 77.52 |
|    | 45 12231 | 0.09  | 77.6  |
|    | 46 12232 | 0.17  | 77.78 |

|          |      |       |
|----------|------|-------|
| 47 12321 | 0.09 | 77.87 |
| 48 12342 | 0.09 | 77.95 |
| 49 13331 | 0.09 | 78.04 |
| 50 13421 | 0.09 | 78.13 |
| 51 21111 | 0.09 | 78.22 |
| 52 21121 | 2.01 | 80.23 |
| 53 21122 | 0.96 | 81.19 |
| 54 21123 | 0.44 | 81.63 |
| 55 21131 | 0.87 | 82.5  |
| 56 21132 | 0.7  | 83.2  |
| 57 21133 | 0.26 | 83.46 |
| 58 21212 | 0.09 | 83.55 |
| 59 21221 | 0.52 | 84.08 |
| 60 21222 | 0.61 | 84.69 |
| 61 21223 | 0.35 | 85.04 |
| 62 21225 | 0.09 | 85.13 |
| 63 21231 | 0.61 | 85.74 |
| 64 21232 | 0.17 | 85.91 |
| 65 21233 | 0.26 | 86.18 |
| 66 21234 | 0.09 | 86.26 |
| 67 21241 | 0.17 | 86.44 |
| 68 21243 | 0.09 | 86.53 |
| 69 21311 | 0.09 | 86.61 |
| 70 21322 | 0.09 | 86.7  |
| 71 21331 | 0.26 | 86.96 |
| 72 21332 | 0.17 | 87.14 |
| 73 21333 | 0.26 | 87.4  |
| 74 21334 | 0.17 | 87.58 |
| 75 21341 | 0.26 | 87.84 |
| 76 21342 | 0.09 | 87.93 |
| 77 21343 | 0.09 | 88.01 |
| 78 22131 | 0.09 | 88.1  |
| 79 22232 | 0.09 | 88.19 |
| 80 22234 | 0.09 | 88.28 |
| 81 22235 | 0.09 | 88.36 |
| 82 22242 | 0.09 | 88.45 |
| 83 22331 | 0.09 | 88.54 |
| 84 22332 | 0.09 | 88.63 |
| 85 22333 | 0.09 | 88.71 |
| 86 22342 | 0.09 | 88.8  |
| 87 22431 | 0.09 | 88.89 |
| 88 23231 | 0.09 | 88.98 |
| 89 23331 | 0.09 | 89.06 |
| 90 23342 | 0.09 | 89.15 |
| 91 23425 | 0.09 | 89.24 |
| 92 31111 | 0.09 | 89.33 |
| 93 31121 | 0.26 | 89.59 |
| 94 31122 | 0.09 | 89.68 |
| 95 31131 | 0.52 | 90.2  |
| 96 31132 | 0.09 | 90.29 |

|           |      |       |
|-----------|------|-------|
| 97 31133  | 0.09 | 90.38 |
| 98 31134  | 0.09 | 90.46 |
| 99 31142  | 0.09 | 90.55 |
| 100 31144 | 0.17 | 90.73 |
| 101 31211 | 0.09 | 90.81 |
| 102 31212 | 0.09 | 90.9  |
| 103 31213 | 0.09 | 90.99 |
| 104 31221 | 0.17 | 91.16 |
| 105 31222 | 0.17 | 91.34 |
| 106 31223 | 0.09 | 91.43 |
| 107 31231 | 0.52 | 91.95 |
| 108 31232 | 0.09 | 92.04 |
| 109 31233 | 0.17 | 92.21 |
| 110 31234 | 0.09 | 92.3  |
| 111 31241 | 0.09 | 92.39 |
| 112 31242 | 0.17 | 92.56 |
| 113 31252 | 0.09 | 92.65 |
| 114 31311 | 0.17 | 92.83 |
| 115 31323 | 0.09 | 92.91 |
| 116 31331 | 0.17 | 93.09 |
| 117 31332 | 0.09 | 93.18 |
| 118 31333 | 0.35 | 93.53 |
| 119 31334 | 0.09 | 93.61 |
| 120 31341 | 0.09 | 93.7  |
| 121 31442 | 0.09 | 93.79 |
| 122 32221 | 0.09 | 93.88 |
| 123 32233 | 0.09 | 93.96 |
| 124 32241 | 0.09 | 94.05 |
| 125 32331 | 0.17 | 94.23 |
| 126 32332 | 0.17 | 94.4  |
| 127 32342 | 0.09 | 94.49 |
| 128 32452 | 0.09 | 94.58 |
| 129 32455 | 0.09 | 94.66 |
| 130 32542 | 0.09 | 94.75 |
| 131 33221 | 0.09 | 94.84 |
| 132 33231 | 0.09 | 94.93 |
| 133 33233 | 0.09 | 95.01 |
| 134 33244 | 0.09 | 95.1  |
| 135 33254 | 0.09 | 95.19 |
| 136 33332 | 0.09 | 95.28 |
| 137 33411 | 0.09 | 95.36 |
| 138 33432 | 0.09 | 95.45 |
| 139 33541 | 0.09 | 95.54 |
| 140 34331 | 0.09 | 95.63 |
| 141 41111 | 0.09 | 95.71 |
| 142 41112 | 0.09 | 95.8  |
| 143 41121 | 0.09 | 95.89 |
| 144 41132 | 0.09 | 95.98 |
| 145 41222 | 0.09 | 96.06 |
| 146 41231 | 0.26 | 96.33 |

|           |      |       |
|-----------|------|-------|
| 147 41241 | 0.17 | 96.5  |
| 148 41321 | 0.09 | 96.59 |
| 149 41323 | 0.09 | 96.68 |
| 150 41331 | 0.09 | 96.76 |
| 151 41332 | 0.17 | 96.94 |
| 152 41341 | 0.17 | 97.11 |
| 153 41435 | 0.09 | 97.2  |
| 154 41441 | 0.26 | 97.46 |
| 155 41442 | 0.09 | 97.55 |
| 156 41542 | 0.09 | 97.64 |
| 157 42322 | 0.09 | 97.73 |
| 158 42333 | 0.09 | 97.81 |
| 159 42341 | 0.09 | 97.9  |
| 160 42432 | 0.09 | 97.99 |
| 161 42442 | 0.09 | 98.08 |
| 162 42443 | 0.09 | 98.16 |
| 163 42445 | 0.09 | 98.25 |
| 164 42553 | 0.09 | 98.34 |
| 165 43333 | 0.09 | 98.43 |
| 166 43342 | 0.09 | 98.51 |
| 167 43432 | 0.09 | 98.6  |
| 168 43435 | 0.09 | 98.69 |
| 169 43443 | 0.09 | 98.78 |
| 170 43444 | 0.17 | 98.95 |
| 171 44331 | 0.17 | 99.13 |
| 172 44431 | 0.09 | 99.21 |
| 173 44444 | 0.09 | 99.3  |
| 174 44453 | 0.09 | 99.39 |
| 175 51111 | 0.09 | 99.48 |
| 176 51343 | 0.09 | 99.56 |
| 177 51431 | 0.09 | 99.65 |
| 178 52533 | 0.09 | 99.74 |
| 179 53521 | 0.09 | 99.83 |
| 180 53532 | 0.09 | 99.91 |
| 181 54432 | 0.09 | 100   |
