# Supplementary material for: A French Value Set for the EQ-5D-5L
Source: PubMed Central journal article supplement — Pharmacoeconomics. 2020 Jan 8;38(4):413–25. doi: 10.1007/s40273-019-00876-4 (PMC7080328; doi:10.1007/s40273-019-00876-4), 2020-01-08

ESM 6- Supplementary Figures-

## Pharmacoeconomics

### A French value set for the EQ-5D-5L

Luiz Flavio Andrade<sup>1</sup>, Kristina Ludwig<sup>2</sup>, Juan Manuel Ramos Goni<sup>3</sup>,  
Mark Oppe<sup>3</sup>, Gérard de Pouvourville<sup>1</sup>.

1. Essec Business School, 3, Avenue Bernard Hirsch, CS 50105, Cergy Pontoise, France
2. Euroqol Research Foundation, Marten Meesweg 107, 3068 AV Rotterdam, the Netherlands
3. Axentiva Solutions, Calle Calvario, 271 - 1 B, Tacoronte 38340 Tenerife, Spain

Corresponding author:  
Gérard de Pouvourville  
[pouvourville@essec.edu](mailto:pouvourville@essec.edu)  
+33614491267

Supplementary figures

Predicted values by cTTO and DCE *versus* observed values

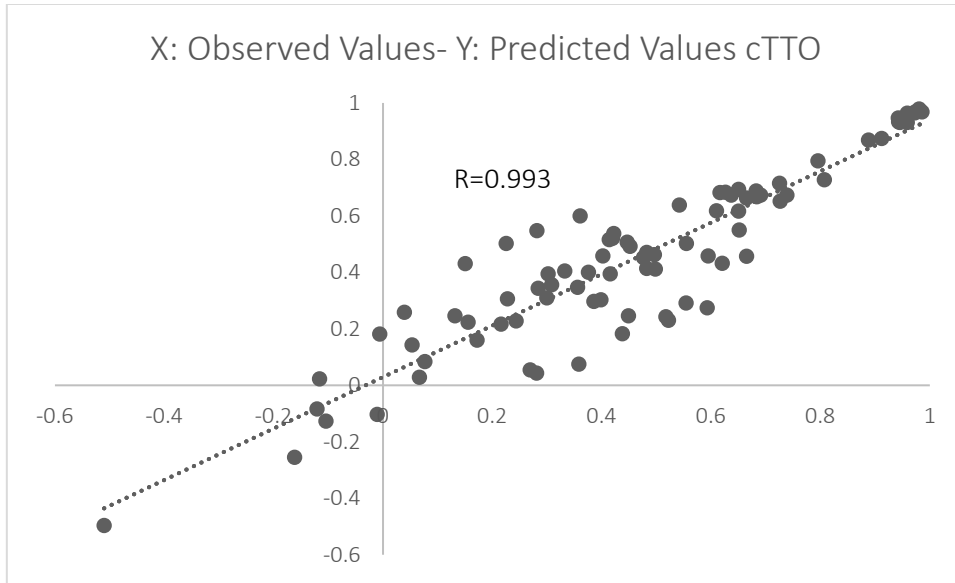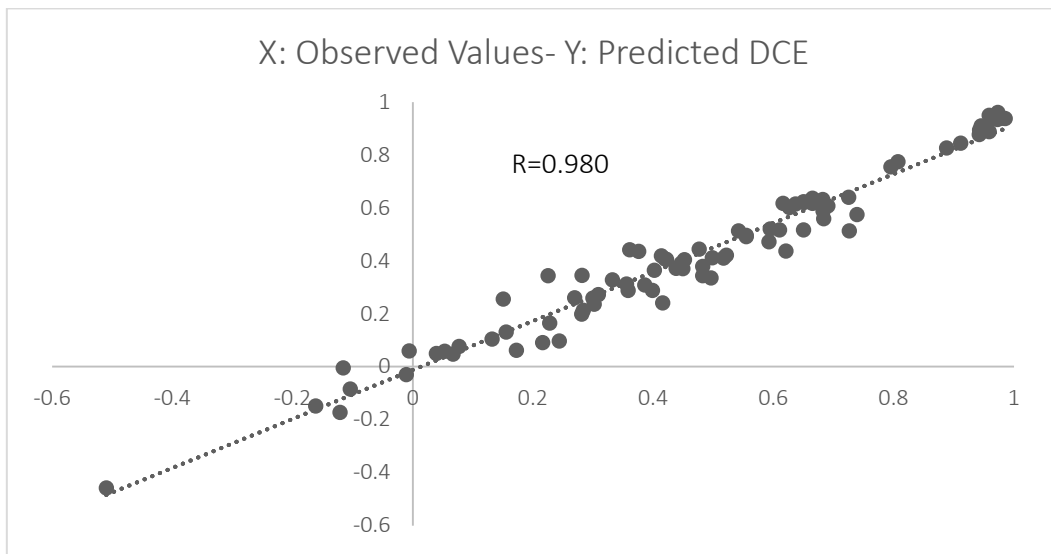

Supplement: 40273_2019_876_MOESM6_ESM.pdf [file 40273_2019_876_MOESM6_ESM.pdf]
