# Supplementary material for: A French Value Set for the EQ-5D-5L
Source: Springer Nature journal article supplement (doi:10.1007/s40273-019-00876-4), 2020-01-08
Supplement: MOESM2 [file 24131014]

ESM 2- Full adjusted hybrid model with correction  
for heteroscedasticity

**Pharmacoeconomics**

**A French value set for the EQ-5D-5L**

Luiz Flavio Andrade<sup>1</sup>, Kristina Ludwig<sup>2</sup>, Juan Manuel Ramos Goni<sup>3</sup>,  
Mark Oppe<sup>3</sup>, Gérard de Pouvourville<sup>1</sup>.

1. Essec Business School, 3,Avenue Bernard Hirsch, CS 50105,  
Cergy Pontoise, France
2. Euroqol Research Foundation, Marten Meesweg 107, 3068  
AV Rotterdam, the Netherlands
3. Axentiva Solutions, Calle Calvario, 271 - 1 B, Tacoronte  
38340 Tenerife, Spain

Corresponding author:

Gérard de Pouvourville

[pouvourville@essec.edu](mailto:pouvourville@essec.edu)

+33614491267

## ONLY MAIN EFFECTS WEIGHTED

|         | $\beta$   | SE       | z      | P>t   | 95% IC    |           |
|---------|-----------|----------|--------|-------|-----------|-----------|
| model   |           |          |        |       |           |           |
| _mo2    | .0375934  | .0059818 | 6.28   | 0.000 | .0258693  | .0493175  |
| _mo3    | .0101557  | .0094003 | 1.08   | 0.280 | -.0082686 | .0285801  |
| _mo4    | .1317525  | .0104004 | 12.67  | 0.000 | .1113681  | .1521369  |
| _mo5    | .1456024  | .0101989 | 14.28  | 0.000 | .125613   | .1655918  |
| _sc2    | .0365663  | .0058653 | 6.23   | 0.000 | .0250705  | .0480621  |
| _sc3    | .0142219  | .0088924 | 1.60   | 0.110 | -.0032069 | .0316507  |
| _sc4    | .1214739  | .0102913 | 11.80  | 0.000 | .1013033  | .1416446  |
| _sc5    | .0860821  | .0096369 | 8.93   | 0.000 | .0671941  | .1049702  |
| _ua2    | .0331352  | .0055433 | 5.98   | 0.000 | .0222705  | .0439999  |
| _ua3    | .0066673  | .0085797 | 0.78   | 0.437 | -.0101486 | .0234832  |
| _ua4    | .1171008  | .0097733 | 11.98  | 0.000 | .0979455  | .136256   |
| _ua5    | .0831678  | .0098138 | 8.47   | 0.000 | .0639331  | .1024025  |
| _pd2    | .0219866  | .0049395 | 4.45   | 0.000 | .0123054  | .0316677  |
| _pd3    | .0250671  | .0090027 | 2.78   | 0.005 | .0074221  | .042712   |
| _pd4    | .2167086  | .0104372 | 20.76  | 0.000 | .196252   | .2371652  |
| _pd5    | .1802551  | .0109805 | 16.42  | 0.000 | .1587337  | .2017764  |
| _ad2    | .0204675  | .0050814 | 4.03   | 0.000 | .0105082  | .0304268  |
| _ad3    | .0263745  | .0087648 | 3.01   | 0.003 | .0091958  | .0435532  |
| _ad4    | .1532286  | .0097961 | 15.64  | 0.000 | .1340285  | .1724287  |
| _ad5    | .057981   | .0095401 | 6.08   | 0.000 | .0392827  | .0766794  |
| -----   |           |          |        |       |           |           |
| Insigma |           |          |        |       |           |           |
| _mo2    | .222334   | .0257884 | 8.62   | 0.000 | .1717897  | .2728784  |
| _mo3    | .2114701  | .0281951 | 7.50   | 0.000 | .1562088  | .2667315  |
| _mo4    | -.0640904 | .0310527 | -2.06  | 0.039 | -.1249526 | -.0032282 |
| _mo5    | .0391834  | .0299957 | 1.31   | 0.191 | -.0196072 | .0979739  |
| _sc2    | .2937555  | .0254881 | 11.53  | 0.000 | .2437998  | .3437112  |
| _sc3    | .10135    | .030664  | 3.31   | 0.001 | .0412496  | .1614504  |
| _sc4    | .0107042  | .0291575 | 0.37   | 0.714 | -.0464434 | .0678518  |
| _sc5    | -.0770931 | .0241622 | -3.19  | 0.001 | -.1244502 | -.0297359 |
| _ua2    | .1603441  | .0284356 | 5.64   | 0.000 | .1046113  | .2160768  |
| _ua3    | .0945187  | .0278438 | 3.39   | 0.001 | .0399459  | .1490915  |
| _ua4    | .1772299  | .0298473 | 5.94   | 0.000 | .1187302  | .2357295  |
| _ua5    | -.2698957 | .0283727 | -9.51  | 0.000 | -.3255051 | -.2142863 |
| _pd2    | .0688856  | .0239054 | 2.88   | 0.004 | .0220319  | .1157393  |
| _pd3    | .2584163  | .029219  | 8.84   | 0.000 | .201148   | .3156845  |
| _pd4    | -.0359463 | .0285127 | -1.26  | 0.207 | -.0918302 | .0199376  |
| _pd5    | .2192129  | .0303306 | 7.23   | 0.000 | .1597659  | .2786598  |
| _ad2    | .1310546  | .026738  | 4.90   | 0.000 | .0786491  | .1834602  |
| _ad3    | .1225588  | .0291666 | 4.20   | 0.000 | .0653933  | .1797243  |
| _ad4    | .2301407  | .0266546 | 8.63   | 0.000 | .1778986  | .2823828  |
| _ad5    | -.1062077 | .0238705 | -4.45  | 0.000 | -.152993  | -.0594224 |
| _cons   | -2.163959 | .0303022 | -71.41 | 0.000 | -2.22335  | -2.104568 |
| -----   |           |          |        |       |           |           |
| Intheta |           |          |        |       |           |           |
| _cons   | 1.653629  | .0283892 | 58.25  | 0.000 | 1.597987  | 1.709271  |
| Theta   | 5.226     |          |        |       |           |           |
| -----   |           |          |        |       |           |           |
