# Supplementary material for: A French Value Set for the EQ-5D-5L
Source: Springer Nature journal article supplement (doi:10.1007/s40273-019-00876-4), 2020-01-08
Supplement: MOESM3 [file 24131014]

ESM3- Supplementary sample characteristics

## Pharmacoeconomics

### A French value set for the EQ-5D-5L

Luiz Flavio Andrade<sup>1</sup>, Kristina Ludwig<sup>2</sup>, Juan Manuel Ramos Goni<sup>3</sup>,  
Mark Oppe<sup>3</sup>, Gérard de Pouvourville<sup>1</sup>.

1. Essec Business School, 3,Avenue Bernard Hirsch, CS 50105,  
Cergy Pontoise, France
2. Euroqol Research Foundation, Marten Meesweg 107, 3068 AV  
Rotterdam, the Netherlands
3. Axentiva Solutions, Calle Calvario, 271 - 1 B, Tacoronte 38340  
Tenerife, Spain

Corresponding author:  
Gérard de Pouvourville  
[pouvourville@essec.edu](mailto:pouvourville@essec.edu)  
+33614491267

**Table 1- Experience with disease**

|                              | N.    | Percent |
|------------------------------|-------|---------|
| <b>Caring for others</b>     |       |         |
| NO                           | 830   | 79.20   |
| YES                          | 218   | 20.80   |
|                              |       |         |
| <b>Caring for the family</b> |       |         |
|                              |       |         |
| NO                           | 262   | 25.00   |
| YES                          | 786   | 75.00   |
|                              |       |         |
| <b>Caring for yourself</b>   |       |         |
|                              |       |         |
| NO                           | 804   | 76.72   |
| YES                          | 244   | 23.28   |
|                              |       |         |
| Total                        | 1,048 | 100.00  |

Table 2- Distribution of sample according to size of residential area  
Sample vs National distribution

|                         | 1                   | 2                        | 3                            | 4            | 5                             |             |         |
|-------------------------|---------------------|--------------------------|------------------------------|--------------|-------------------------------|-------------|---------|
| Unit of residence       | Rural<br><2k inhab. | From 2k to<br>20k inhab. | From 20 k to<br>100 k inhab. | > 100k inhab | Paris<br>metropolitan<br>area | Total       | %       |
| 1. Parisian region      | 0                   | 44                       | 0                            | 0            | 262                           | <b>306</b>  | 26.84%  |
| 2. North                | 22                  | 0                        | 0                            | 80           | 0                             | <b>102</b>  | 8.95%   |
| 3. East                 | 17                  | 29                       | 19                           | 13           | 0                             | <b>78</b>   | 6.84%   |
| 4. Bassin Parisien East | 17                  | 24                       | 23                           | 15           | 0                             | <b>79</b>   | 6.93%   |
| 5. Bassin Parisien West | 10                  | 0                        | 0                            | 0            | 0                             | <b>10</b>   | 0.88%   |
| 6. West                 | 29                  | 32                       | 29                           | 34           | 0                             | <b>124</b>  | 10.88%  |
| 7. South West           | 75                  | 42                       | 17                           | 86           | 0                             | <b>220</b>  | 19.30%  |
| 8. South-East           | 64                  | 17                       | 51                           | 19           | 0                             | <b>151</b>  | 13.25%  |
| 9. Mediterranean region | 17                  | 9                        | 0                            | 44           | 0                             | <b>70</b>   | 6.14%   |
| <b>Total</b>            | <b>251</b>          | <b>197</b>               | <b>139</b>                   | <b>291</b>   | <b>262</b>                    | <b>1140</b> | 100.00% |
|                         | 22.02%              | 17.28%                   | 12.19%                       | 25.53%       | 22.98%                        | 100.00%     |         |

Table 3- Classification of socio-professional status used for stratification

|                                                     |                                                                          |
|-----------------------------------------------------|--------------------------------------------------------------------------|
| Higher retired and active socio-professional status | Craft and Trade, Managers<br>Managerial staff<br>Technicians and clerks; |
| Lower retired and socio-professional status         | Employees; Farmers; Workers                                              |
| No professional activity                            | Students; Domestic activities                                            |

Table 4- Detailed occupational status : sample versus national distribution

|                                                         | <b>General Population</b> | <b>France-5L</b> |
|---------------------------------------------------------|---------------------------|------------------|
| <b>Students/Retirees/No prof activity</b>               | 47,8%                     | 36,9%            |
| <b>Farmers</b>                                          | 0,9%                      | 0,4%             |
| <b>Craft and Trade, entrepreneurs</b>                   | 3,4%                      | 3,2%             |
| <b>Managers and higher education<br/>professionnals</b> | 9,3%                      | 9,1%             |
| <b>Middle level professionnals and employees</b>        | 13,5%                     | 15,1%            |
| <b>Employees</b>                                        | 14,3%                     | 22,1%            |
| <b>Workers</b>                                          | 10,6%                     | 12,8%            |
