# Supplementary material for: A French Value Set for the EQ-5D-5L
Source: Springer Nature journal article supplement (doi:10.1007/s40273-019-00876-4), 2020-01-08
Supplement: MOESM5 [file 24131014]

ESM 5- Value Set

## Pharmacoeconomics

### A French value set for the EQ-5D-5L

Luiz Flavio Andrade<sup>1</sup>, Kristina Ludwig<sup>2</sup>, Juan Manuel Ramos Goni<sup>3</sup>,  
Mark Oppe<sup>3</sup>, Gérard de Pouvourville<sup>1</sup>.

1. Essec Business School, 3, Avenue Bernard Hirsch, CS 50105, Cergy Pontoise, France
2. Euroqol Research Foundation, Marten Meesweg 107, 3068 AV Rotterdam, the Netherlands
3. Axentiva Solutions, Calle Calvario, 271 - 1 B, Tacoronte 38340 Tenerife, Spain

Corresponding author:  
Gérard de Pouvourville  
[pouvourville@essec.edu](mailto:pouvourville@essec.edu)  
+33614491267

| <b>Health state</b> | <b>Utility</b> |
|---------------------|----------------|
| 11111               | 1              |
| 11112               | .97954         |
| 11113               | .95317         |
| 11114               | .79995         |
| 11115               | .74197         |
| 11121               | .97802         |
| 11122               | .95756         |
| 11123               | .93119         |
| 11124               | .77797         |
| 11125               | .71999         |
| 11131               | .95296         |
| 11132               | .9325          |
| 11133               | .90613         |
| 11134               | .75291         |
| 11135               | .69493         |
| 11141               | .73626         |
| 11142               | .7158          |
| 11143               | .68943         |
| 11144               | .53621         |
| 11145               | .47823         |
| 11151               | .55601         |
| 11152               | .53555         |
| 11153               | .50918         |
| 11154               | .35596         |
| 11155               | .29798         |
| 11211               | .96687         |
| 11212               | .94641         |
| 11213               | .92004         |
| 11214               | .76682         |
| 11215               | .70884         |
| 11221               | .94489         |
| 11222               | .92443         |
| 11223               | .89806         |
| 11224               | .74484         |
| 11225               | .68686         |
| 11231               | .91983         |
| 11232               | .89937         |
| 11233               | .873           |
| 11234               | .71978         |
| 11235               | .6618          |
| 11241               | .70313         |

|       |        |
|-------|--------|
| 11242 | .68267 |
| 11243 | .6563  |
| 11244 | .50308 |
| 11245 | .4451  |
| 11251 | .52288 |
| 11252 | .50242 |
| 11253 | .47605 |
| 11254 | .32283 |
| 11255 | .26485 |
| 11311 | .96021 |
| 11312 | .93975 |
| 11313 | .91338 |
| 11314 | .76016 |
| 11315 | .70218 |
| 11321 | .93823 |
| 11322 | .91777 |
| 11323 | .8914  |
| 11324 | .73818 |
| 11325 | .6802  |
| 11331 | .91317 |
| 11332 | .89271 |
| 11333 | .86634 |
| 11334 | .71312 |
| 11335 | .65514 |
| 11341 | .69647 |
| 11342 | .67601 |
| 11343 | .64964 |
| 11344 | .49642 |
| 11345 | .43844 |
| 11351 | .51622 |
| 11352 | .49576 |
| 11353 | .46939 |
| 11354 | .31617 |
| 11355 | .25819 |
| 11411 | .84311 |
| 11412 | .82265 |
| 11413 | .79628 |
| 11414 | .64306 |
| 11415 | .58508 |
| 11421 | .82113 |
| 11422 | .80067 |
| 11423 | .7743  |
| 11424 | .62108 |

|       |        |
|-------|--------|
| 11425 | .5631  |
| 11431 | .79607 |
| 11432 | .77561 |
| 11433 | .74924 |
| 11434 | .59602 |
| 11435 | .53804 |
| 11441 | .57937 |
| 11442 | .55891 |
| 11443 | .53254 |
| 11444 | .37932 |
| 11445 | .32134 |
| 11451 | .39912 |
| 11452 | .37866 |
| 11453 | .35229 |
| 11454 | .19907 |
| 11455 | .14109 |
| 11511 | .75995 |
| 11512 | .73949 |
| 11513 | .71312 |
| 11514 | .5599  |
| 11515 | .50192 |
| 11521 | .73797 |
| 11522 | .71751 |
| 11523 | .69114 |
| 11524 | .53792 |
| 11525 | .47994 |
| 11531 | .71291 |
| 11532 | .69245 |
| 11533 | .66608 |
| 11534 | .51286 |
| 11535 | .45488 |
| 11541 | .49621 |
| 11542 | .47575 |
| 11543 | .44938 |
| 11544 | .29616 |
| 11545 | .23818 |
| 11551 | .31596 |
| 11552 | .2955  |
| 11553 | .26913 |
| 11554 | .11591 |
| 11555 | .05793 |
| 12111 | .96344 |
| 12112 | .94298 |

|       |        |
|-------|--------|
| 12113 | .91661 |
| 12114 | .76339 |
| 12115 | .70541 |
| 12121 | .94146 |
| 12122 | .921   |
| 12123 | .89463 |
| 12124 | .74141 |
| 12125 | .68343 |
| 12131 | .9164  |
| 12132 | .89594 |
| 12133 | .86957 |
| 12134 | .71635 |
| 12135 | .65837 |
| 12141 | .6997  |
| 12142 | .67924 |
| 12143 | .65287 |
| 12144 | .49965 |
| 12145 | .44167 |
| 12151 | .51945 |
| 12152 | .49899 |
| 12153 | .47262 |
| 12154 | .3194  |
| 12155 | .26142 |
| 12211 | .93031 |
| 12212 | .90985 |
| 12213 | .88348 |
| 12214 | .73026 |
| 12215 | .67228 |
| 12221 | .90833 |
| 12222 | .88787 |
| 12223 | .8615  |
| 12224 | .70828 |
| 12225 | .6503  |
| 12231 | .88327 |
| 12232 | .86281 |
| 12233 | .83644 |
| 12234 | .68322 |
| 12235 | .62524 |
| 12241 | .66657 |
| 12242 | .64611 |
| 12243 | .61974 |
| 12244 | .46652 |
| 12245 | .40854 |

|       |        |
|-------|--------|
| 12251 | .48632 |
| 12252 | .46586 |
| 12253 | .43949 |
| 12254 | .28627 |
| 12255 | .22829 |
| 12311 | .92365 |
| 12312 | .90319 |
| 12313 | .87682 |
| 12314 | .7236  |
| 12315 | .66562 |
| 12321 | .90167 |
| 12322 | .88121 |
| 12323 | .85484 |
| 12324 | .70162 |
| 12325 | .64364 |
| 12331 | .87661 |
| 12332 | .85615 |
| 12333 | .82978 |
| 12334 | .67656 |
| 12335 | .61858 |
| 12341 | .65991 |
| 12342 | .63945 |
| 12343 | .61308 |
| 12344 | .45986 |
| 12345 | .40188 |
| 12351 | .47966 |
| 12352 | .4592  |
| 12353 | .43283 |
| 12354 | .27961 |
| 12355 | .22163 |
| 12411 | .80655 |
| 12412 | .78609 |
| 12413 | .75972 |
| 12414 | .6065  |
| 12415 | .54852 |
| 12421 | .78457 |
| 12422 | .76411 |
| 12423 | .73774 |
| 12424 | .58452 |
| 12425 | .52654 |
| 12431 | .75951 |
| 12432 | .73905 |
| 12433 | .71268 |

|       |        |
|-------|--------|
| 12434 | .55946 |
| 12435 | .50148 |
| 12441 | .54281 |
| 12442 | .52235 |
| 12443 | .49598 |
| 12444 | .34276 |
| 12445 | .28478 |
| 12451 | .36256 |
| 12452 | .3421  |
| 12453 | .31573 |
| 12454 | .16251 |
| 12455 | .10453 |
| 12511 | .72339 |
| 12512 | .70293 |
| 12513 | .67656 |
| 12514 | .52334 |
| 12515 | .46536 |
| 12521 | .70141 |
| 12522 | .68095 |
| 12523 | .65458 |
| 12524 | .50136 |
| 12525 | .44338 |
| 12531 | .67635 |
| 12532 | .65589 |
| 12533 | .62952 |
| 12534 | .4763  |
| 12535 | .41832 |
| 12541 | .45965 |
| 12542 | .43919 |
| 12543 | .41282 |
| 12544 | .2596  |
| 12545 | .20162 |
| 12551 | .2794  |
| 12552 | .25894 |
| 12553 | .23257 |
| 12554 | .07935 |
| 12555 | .02137 |
| 13111 | .94922 |
| 13112 | .92876 |
| 13113 | .90239 |
| 13114 | .74917 |
| 13115 | .69119 |
| 13121 | .92724 |

|       |        |
|-------|--------|
| 13122 | .90678 |
| 13123 | .88041 |
| 13124 | .72719 |
| 13125 | .66921 |
| 13131 | .90218 |
| 13132 | .88172 |
| 13133 | .85535 |
| 13134 | .70213 |
| 13135 | .64415 |
| 13141 | .68548 |
| 13142 | .66502 |
| 13143 | .63865 |
| 13144 | .48543 |
| 13145 | .42745 |
| 13151 | .50523 |
| 13152 | .48477 |
| 13153 | .4584  |
| 13154 | .30518 |
| 13155 | .2472  |
| 13211 | .91609 |
| 13212 | .89563 |
| 13213 | .86926 |
| 13214 | .71604 |
| 13215 | .65806 |
| 13221 | .89411 |
| 13222 | .87365 |
| 13223 | .84728 |
| 13224 | .69406 |
| 13225 | .63608 |
| 13231 | .86905 |
| 13232 | .84859 |
| 13233 | .82222 |
| 13234 | .669   |
| 13235 | .61102 |
| 13241 | .65235 |
| 13242 | .63189 |
| 13243 | .60552 |
| 13244 | .4523  |
| 13245 | .39432 |
| 13251 | .4721  |
| 13252 | .45164 |
| 13253 | .42527 |
| 13254 | .27205 |



|       |        |
|-------|--------|
| 13255 | .21407 |
| 13311 | .90943 |
| 13312 | .88897 |
| 13313 | .8626  |
| 13314 | .70938 |
| 13315 | .6514  |
| 13321 | .88745 |
| 13322 | .86699 |
| 13323 | .84062 |
| 13324 | .6874  |
| 13325 | .62942 |
| 13331 | .86239 |
| 13332 | .84193 |
| 13333 | .81556 |
| 13334 | .66234 |
| 13335 | .60436 |
| 13341 | .64569 |
| 13342 | .62523 |
| 13343 | .59886 |
| 13344 | .44564 |
| 13345 | .38766 |
| 13351 | .46544 |
| 13352 | .44498 |
| 13353 | .41861 |
| 13354 | .26539 |
| 13355 | .20741 |
| 13411 | .79233 |
| 13412 | .77187 |
| 13413 | .7455  |
| 13414 | .59228 |
| 13415 | .5343  |
| 13421 | .77035 |
| 13422 | .74989 |
| 13423 | .72352 |
| 13424 | .5703  |
| 13425 | .51232 |
| 13431 | .74529 |
| 13432 | .72483 |
| 13433 | .69846 |
| 13434 | .54524 |
| 13435 | .48726 |
| 13441 | .52859 |
| 13442 | .50813 |

|       |        |
|-------|--------|
| 13443 | .48176 |
| 13444 | .32854 |
| 13445 | .27056 |
| 13451 | .34834 |
| 13452 | .32788 |
| 13453 | .30151 |
| 13454 | .14829 |
| 13455 | .09031 |
| 13511 | .70917 |
| 13512 | .68871 |
| 13513 | .66234 |
| 13514 | .50912 |
| 13515 | .45114 |
| 13521 | .68719 |
| 13522 | .66673 |
| 13523 | .64036 |
| 13524 | .48714 |
| 13525 | .42916 |
| 13531 | .66213 |
| 13532 | .64167 |
| 13533 | .6153  |
| 13534 | .46208 |
| 13535 | .4041  |
| 13541 | .44543 |
| 13542 | .42497 |
| 13543 | .3986  |
| 13544 | .24538 |
| 13545 | .1874  |
| 13551 | .26518 |
| 13552 | .24472 |
| 13553 | .21835 |
| 13554 | .06513 |
| 13555 | .00715 |
| 14111 | .82775 |
| 14112 | .80729 |
| 14113 | .78092 |
| 14114 | .6277  |
| 14115 | .56972 |
| 14121 | .80577 |
| 14122 | .78531 |
| 14123 | .75894 |
| 14124 | .60572 |
| 14125 | .54774 |

|       |        |
|-------|--------|
| 14131 | .78071 |
| 14132 | .76025 |
| 14133 | .73388 |
| 14134 | .58066 |
| 14135 | .52268 |
| 14141 | .56401 |
| 14142 | .54355 |
| 14143 | .51718 |
| 14144 | .36396 |
| 14145 | .30598 |
| 14151 | .38376 |
| 14152 | .3633  |
| 14153 | .33693 |
| 14154 | .18371 |
| 14155 | .12573 |
| 14211 | .79462 |
| 14212 | .77416 |
| 14213 | .74779 |
| 14214 | .59457 |
| 14215 | .53659 |
| 14221 | .77264 |
| 14222 | .75218 |
| 14223 | .72581 |
| 14224 | .57259 |
| 14225 | .51461 |
| 14231 | .74758 |
| 14232 | .72712 |
| 14233 | .70075 |
| 14234 | .54753 |
| 14235 | .48955 |
| 14241 | .53088 |
| 14242 | .51042 |
| 14243 | .48405 |
| 14244 | .33083 |
| 14245 | .27285 |
| 14251 | .35063 |
| 14252 | .33017 |
| 14253 | .3038  |
| 14254 | .15058 |
| 14255 | .0926  |
| 14311 | .78796 |
| 14312 | .7675  |
| 14313 | .74113 |

|       |        |
|-------|--------|
| 14314 | .58791 |
| 14315 | .52993 |
| 14321 | .76598 |
| 14322 | .74552 |
| 14323 | .71915 |
| 14324 | .56593 |
| 14325 | .50795 |
| 14331 | .74092 |
| 14332 | .72046 |
| 14333 | .69409 |
| 14334 | .54087 |
| 14335 | .48289 |
| 14341 | .52422 |
| 14342 | .50376 |
| 14343 | .47739 |
| 14344 | .32417 |
| 14345 | .26619 |
| 14351 | .34397 |
| 14352 | .32351 |
| 14353 | .29714 |
| 14354 | .14392 |
| 14355 | .08594 |
| 14411 | .67086 |
| 14412 | .6504  |
| 14413 | .62403 |
| 14414 | .47081 |
| 14415 | .41283 |
| 14421 | .64888 |
| 14422 | .62842 |
| 14423 | .60205 |
| 14424 | .44883 |
| 14425 | .39085 |
| 14431 | .62382 |
| 14432 | .60336 |
| 14433 | .57699 |
| 14434 | .42377 |
| 14435 | .36579 |
| 14441 | .40712 |
| 14442 | .38666 |
| 14443 | .36029 |
| 14444 | .20707 |
| 14445 | .14909 |
| 14451 | .22687 |

|       |         |
|-------|---------|
| 14452 | .20641  |
| 14453 | .18004  |
| 14454 | .02682  |
| 14455 | -.03116 |
| 14511 | .5877   |
| 14512 | .56724  |
| 14513 | .54087  |
| 14514 | .38765  |
| 14515 | .32967  |
| 14521 | .56572  |
| 14522 | .54526  |
| 14523 | .51889  |
| 14524 | .36567  |
| 14525 | .30769  |
| 14531 | .54066  |
| 14532 | .5202   |
| 14533 | .49383  |
| 14534 | .34061  |
| 14535 | .28263  |
| 14541 | .32396  |
| 14542 | .3035   |
| 14543 | .27713  |
| 14544 | .12391  |
| 14545 | .06593  |
| 14551 | .14371  |
| 14552 | .12325  |
| 14553 | .09688  |
| 14554 | -.05634 |
| 14555 | -.11432 |
| 15111 | .74167  |
| 15112 | .72121  |
| 15113 | .69484  |
| 15114 | .54162  |
| 15115 | .48364  |
| 15121 | .71969  |
| 15122 | .69923  |
| 15123 | .67286  |
| 15124 | .51964  |
| 15125 | .46166  |
| 15131 | .69463  |
| 15132 | .67417  |
| 15133 | .6478   |
| 15134 | .49458  |

|       |        |
|-------|--------|
| 15135 | .4366  |
| 15141 | .47793 |
| 15142 | .45747 |
| 15143 | .4311  |
| 15144 | .27788 |
| 15145 | .2199  |
| 15151 | .29768 |
| 15152 | .27722 |
| 15153 | .25085 |
| 15154 | .09763 |
| 15155 | .03965 |
| 15211 | .70854 |
| 15212 | .68808 |
| 15213 | .66171 |
| 15214 | .50849 |
| 15215 | .45051 |
| 15221 | .68656 |
| 15222 | .6661  |
| 15223 | .63973 |
| 15224 | .48651 |
| 15225 | .42853 |
| 15231 | .6615  |
| 15232 | .64104 |
| 15233 | .61467 |
| 15234 | .46145 |
| 15235 | .40347 |
| 15241 | .4448  |
| 15242 | .42434 |
| 15243 | .39797 |
| 15244 | .24475 |
| 15245 | .18677 |
| 15251 | .26455 |
| 15252 | .24409 |
| 15253 | .21772 |
| 15254 | .0645  |
| 15255 | .00652 |
| 15311 | .70188 |
| 15312 | .68142 |
| 15313 | .65505 |
| 15314 | .50183 |
| 15315 | .44385 |
| 15321 | .6799  |
| 15322 | .65944 |

|       |         |
|-------|---------|
| 15323 | .63307  |
| 15324 | .47985  |
| 15325 | .42187  |
| 15331 | .65484  |
| 15332 | .63438  |
| 15333 | .60801  |
| 15334 | .45479  |
| 15335 | .39681  |
| 15341 | .43814  |
| 15342 | .41768  |
| 15343 | .39131  |
| 15344 | .23809  |
| 15345 | .18011  |
| 15351 | .25789  |
| 15352 | .23743  |
| 15353 | .21106  |
| 15354 | .05784  |
| 15355 | -.00014 |
| 15411 | .58478  |
| 15412 | .56432  |
| 15413 | .53795  |
| 15414 | .38473  |
| 15415 | .32675  |
| 15421 | .5628   |
| 15422 | .54234  |
| 15423 | .51597  |
| 15424 | .36275  |
| 15425 | .30477  |
| 15431 | .53774  |
| 15432 | .51728  |
| 15433 | .49091  |
| 15434 | .33769  |
| 15435 | .27971  |
| 15441 | .32104  |
| 15442 | .30058  |
| 15443 | .27421  |
| 15444 | .12099  |
| 15445 | .06301  |
| 15451 | .14079  |
| 15452 | .12033  |
| 15453 | .09396  |
| 15454 | -.05926 |
| 15455 | -.11724 |

|       |         |
|-------|---------|
| 15511 | .50162  |
| 15512 | .48116  |
| 15513 | .45479  |
| 15514 | .30157  |
| 15515 | .24359  |
| 15521 | .47964  |
| 15522 | .45918  |
| 15523 | .43281  |
| 15524 | .27959  |
| 15525 | .22161  |
| 15531 | .45458  |
| 15532 | .43412  |
| 15533 | .40775  |
| 15534 | .25453  |
| 15535 | .19655  |
| 15541 | .23788  |
| 15542 | .21742  |
| 15543 | .19105  |
| 15544 | .03783  |
| 15545 | -.02015 |
| 15551 | .05763  |
| 15552 | .03717  |
| 15553 | .0108   |
| 15554 | -.14242 |
| 15555 | -.2004  |
| 21111 | .96241  |
| 21112 | .94195  |
| 21113 | .91558  |
| 21114 | .76236  |
| 21115 | .70438  |
| 21121 | .94043  |
| 21122 | .91997  |
| 21123 | .8936   |
| 21124 | .74038  |
| 21125 | .6824   |
| 21131 | .91537  |
| 21132 | .89491  |
| 21133 | .86854  |
| 21134 | .71532  |
| 21135 | .65734  |
| 21141 | .69867  |
| 21142 | .67821  |
| 21143 | .65184  |



|       |        |
|-------|--------|
| 21144 | .49862 |
| 21145 | .44064 |
| 21151 | .51842 |
| 21152 | .49796 |
| 21153 | .47159 |
| 21154 | .31837 |
| 21155 | .26039 |
| 21211 | .92928 |
| 21212 | .90882 |
| 21213 | .88245 |
| 21214 | .72923 |
| 21215 | .67125 |
| 21221 | .9073  |
| 21222 | .88684 |
| 21223 | .86047 |
| 21224 | .70725 |
| 21225 | .64927 |
| 21231 | .88224 |
| 21232 | .86178 |
| 21233 | .83541 |
| 21234 | .68219 |
| 21235 | .62421 |
| 21241 | .66554 |
| 21242 | .64508 |
| 21243 | .61871 |
| 21244 | .46549 |
| 21245 | .40751 |
| 21251 | .48529 |
| 21252 | .46483 |
| 21253 | .43846 |
| 21254 | .28524 |
| 21255 | .22726 |
| 21311 | .92262 |
| 21312 | .90216 |
| 21313 | .87579 |
| 21314 | .72257 |
| 21315 | .66459 |
| 21321 | .90064 |
| 21322 | .88018 |
| 21323 | .85381 |
| 21324 | .70059 |
| 21325 | .64261 |
| 21331 | .87558 |

|       |        |
|-------|--------|
| 21332 | .85512 |
| 21333 | .82875 |
| 21334 | .67553 |
| 21335 | .61755 |
| 21341 | .65888 |
| 21342 | .63842 |
| 21343 | .61205 |
| 21344 | .45883 |
| 21345 | .40085 |
| 21351 | .47863 |
| 21352 | .45817 |
| 21353 | .4318  |
| 21354 | .27858 |
| 21355 | .2206  |
| 21411 | .80552 |
| 21412 | .78506 |
| 21413 | .75869 |
| 21414 | .60547 |
| 21415 | .54749 |
| 21421 | .78354 |
| 21422 | .76308 |
| 21423 | .73671 |
| 21424 | .58349 |
| 21425 | .52551 |
| 21431 | .75848 |
| 21432 | .73802 |
| 21433 | .71165 |
| 21434 | .55843 |
| 21435 | .50045 |
| 21441 | .54178 |
| 21442 | .52132 |
| 21443 | .49495 |
| 21444 | .34173 |
| 21445 | .28375 |
| 21451 | .36153 |
| 21452 | .34107 |
| 21453 | .3147  |
| 21454 | .16148 |
| 21455 | .1035  |
| 21511 | .72236 |
| 21512 | .7019  |
| 21513 | .67553 |
| 21514 | .52231 |

|       |        |
|-------|--------|
| 21515 | .46433 |
| 21521 | .70038 |
| 21522 | .67992 |
| 21523 | .65355 |
| 21524 | .50033 |
| 21525 | .44235 |
| 21531 | .67532 |
| 21532 | .65486 |
| 21533 | .62849 |
| 21534 | .47527 |
| 21535 | .41729 |
| 21541 | .45862 |
| 21542 | .43816 |
| 21543 | .41179 |
| 21544 | .25857 |
| 21545 | .20059 |
| 21551 | .27837 |
| 21552 | .25791 |
| 21553 | .23154 |
| 21554 | .07832 |
| 21555 | .02034 |
| 22111 | .92585 |
| 22112 | .90539 |
| 22113 | .87902 |
| 22114 | .7258  |
| 22115 | .66782 |
| 22121 | .90387 |
| 22122 | .88341 |
| 22123 | .85704 |
| 22124 | .70382 |
| 22125 | .64584 |
| 22131 | .87881 |
| 22132 | .85835 |
| 22133 | .83198 |
| 22134 | .67876 |
| 22135 | .62078 |
| 22141 | .66211 |
| 22142 | .64165 |
| 22143 | .61528 |
| 22144 | .46206 |
| 22145 | .40408 |
| 22151 | .48186 |
| 22152 | .4614  |

|       |        |
|-------|--------|
| 22153 | .43503 |
| 22154 | .28181 |
| 22155 | .22383 |
| 22211 | .89272 |
| 22212 | .87226 |
| 22213 | .84589 |
| 22214 | .69267 |
| 22215 | .63469 |
| 22221 | .87074 |
| 22222 | .85028 |
| 22223 | .82391 |
| 22224 | .67069 |
| 22225 | .61271 |
| 22231 | .84568 |
| 22232 | .82522 |
| 22233 | .79885 |
| 22234 | .64563 |
| 22235 | .58765 |
| 22241 | .62898 |
| 22242 | .60852 |
| 22243 | .58215 |
| 22244 | .42893 |
| 22245 | .37095 |
| 22251 | .44873 |
| 22252 | .42827 |
| 22253 | .4019  |
| 22254 | .24868 |
| 22255 | .1907  |
| 22311 | .88606 |
| 22312 | .8656  |
| 22313 | .83923 |
| 22314 | .68601 |
| 22315 | .62803 |
| 22321 | .86408 |
| 22322 | .84362 |
| 22323 | .81725 |
| 22324 | .66403 |
| 22325 | .60605 |
| 22331 | .83902 |
| 22332 | .81856 |
| 22333 | .79219 |
| 22334 | .63897 |
| 22335 | .58099 |

|       |        |
|-------|--------|
| 22341 | .62232 |
| 22342 | .60186 |
| 22343 | .57549 |
| 22344 | .42227 |
| 22345 | .36429 |
| 22351 | .44207 |
| 22352 | .42161 |
| 22353 | .39524 |
| 22354 | .24202 |
| 22355 | .18404 |
| 22411 | .76896 |
| 22412 | .7485  |
| 22413 | .72213 |
| 22414 | .56891 |
| 22415 | .51093 |
| 22421 | .74698 |
| 22422 | .72652 |
| 22423 | .70015 |
| 22424 | .54693 |
| 22425 | .48895 |
| 22431 | .72192 |
| 22432 | .70146 |
| 22433 | .67509 |
| 22434 | .52187 |
| 22435 | .46389 |
| 22441 | .50522 |
| 22442 | .48476 |
| 22443 | .45839 |
| 22444 | .30517 |
| 22445 | .24719 |
| 22451 | .32497 |
| 22452 | .30451 |
| 22453 | .27814 |
| 22454 | .12492 |
| 22455 | .06694 |
| 22511 | .6858  |
| 22512 | .66534 |
| 22513 | .63897 |
| 22514 | .48575 |
| 22515 | .42777 |
| 22521 | .66382 |
| 22522 | .64336 |
| 22523 | .61699 |

|       |         |
|-------|---------|
| 22524 | .46377  |
| 22525 | .40579  |
| 22531 | .63876  |
| 22532 | .6183   |
| 22533 | .59193  |
| 22534 | .43871  |
| 22535 | .38073  |
| 22541 | .42206  |
| 22542 | .4016   |
| 22543 | .37523  |
| 22544 | .22201  |
| 22545 | .16403  |
| 22551 | .24181  |
| 22552 | .22135  |
| 22553 | .19498  |
| 22554 | .04176  |
| 22555 | -.01622 |
| 23111 | .91163  |
| 23112 | .89117  |
| 23113 | .8648   |
| 23114 | .71158  |
| 23115 | .6536   |
| 23121 | .88965  |
| 23122 | .86919  |
| 23123 | .84282  |
| 23124 | .6896   |
| 23125 | .63162  |
| 23131 | .86459  |
| 23132 | .84413  |
| 23133 | .81776  |
| 23134 | .66454  |
| 23135 | .60656  |
| 23141 | .64789  |
| 23142 | .62743  |
| 23143 | .60106  |
| 23144 | .44784  |
| 23145 | .38986  |
| 23151 | .46764  |
| 23152 | .44718  |
| 23153 | .42081  |
| 23154 | .26759  |
| 23155 | .20961  |
| 23211 | .8785   |

|       |        |
|-------|--------|
| 23212 | .85804 |
| 23213 | .83167 |
| 23214 | .67845 |
| 23215 | .62047 |
| 23221 | .85652 |
| 23222 | .83606 |
| 23223 | .80969 |
| 23224 | .65647 |
| 23225 | .59849 |
| 23231 | .83146 |
| 23232 | .811   |
| 23233 | .78463 |
| 23234 | .63141 |
| 23235 | .57343 |
| 23241 | .61476 |
| 23242 | .5943  |
| 23243 | .56793 |
| 23244 | .41471 |
| 23245 | .35673 |
| 23251 | .43451 |
| 23252 | .41405 |
| 23253 | .38768 |
| 23254 | .23446 |
| 23255 | .17648 |
| 23311 | .87184 |
| 23312 | .85138 |
| 23313 | .82501 |
| 23314 | .67179 |
| 23315 | .61381 |
| 23321 | .84986 |
| 23322 | .8294  |
| 23323 | .80303 |
| 23324 | .64981 |
| 23325 | .59183 |
| 23331 | .8248  |
| 23332 | .80434 |
| 23333 | .77797 |
| 23334 | .62475 |
| 23335 | .56677 |
| 23341 | .6081  |
| 23342 | .58764 |
| 23343 | .56127 |
| 23344 | .40805 |

|       |        |
|-------|--------|
| 23345 | .35007 |
| 23351 | .42785 |
| 23352 | .40739 |
| 23353 | .38102 |
| 23354 | .2278  |
| 23355 | .16982 |
| 23411 | .75474 |
| 23412 | .73428 |
| 23413 | .70791 |
| 23414 | .55469 |
| 23415 | .49671 |
| 23421 | .73276 |
| 23422 | .7123  |
| 23423 | .68593 |
| 23424 | .53271 |
| 23425 | .47473 |
| 23431 | .7077  |
| 23432 | .68724 |
| 23433 | .66087 |
| 23434 | .50765 |
| 23435 | .44967 |
| 23441 | .491   |
| 23442 | .47054 |
| 23443 | .44417 |
| 23444 | .29095 |
| 23445 | .23297 |
| 23451 | .31075 |
| 23452 | .29029 |
| 23453 | .26392 |
| 23454 | .1107  |
| 23455 | .05272 |
| 23511 | .67158 |
| 23512 | .65112 |
| 23513 | .62475 |
| 23514 | .47153 |
| 23515 | .41355 |
| 23521 | .6496  |
| 23522 | .62914 |
| 23523 | .60277 |
| 23524 | .44955 |
| 23525 | .39157 |
| 23531 | .62454 |
| 23532 | .60408 |



|       |         |
|-------|---------|
| 23533 | .57771  |
| 23534 | .42449  |
| 23535 | .36651  |
| 23541 | .40784  |
| 23542 | .38738  |
| 23543 | .36101  |
| 23544 | .20779  |
| 23545 | .14981  |
| 23551 | .22759  |
| 23552 | .20713  |
| 23553 | .18076  |
| 23554 | .02754  |
| 23555 | -.03044 |
| 24111 | .79016  |
| 24112 | .7697   |
| 24113 | .74333  |
| 24114 | .59011  |
| 24115 | .53213  |
| 24121 | .76818  |
| 24122 | .74772  |
| 24123 | .72135  |
| 24124 | .56813  |
| 24125 | .51015  |
| 24131 | .74312  |
| 24132 | .72266  |
| 24133 | .69629  |
| 24134 | .54307  |
| 24135 | .48509  |
| 24141 | .52642  |
| 24142 | .50596  |
| 24143 | .47959  |
| 24144 | .32637  |
| 24145 | .26839  |
| 24151 | .34617  |
| 24152 | .32571  |
| 24153 | .29934  |
| 24154 | .14612  |
| 24155 | .08814  |
| 24211 | .75703  |
| 24212 | .73657  |
| 24213 | .7102   |
| 24214 | .55698  |
| 24215 | .499    |

|       |        |
|-------|--------|
| 24221 | .73505 |
| 24222 | .71459 |
| 24223 | .68822 |
| 24224 | .535   |
| 24225 | .47702 |
| 24231 | .70999 |
| 24232 | .68953 |
| 24233 | .66316 |
| 24234 | .50994 |
| 24235 | .45196 |
| 24241 | .49329 |
| 24242 | .47283 |
| 24243 | .44646 |
| 24244 | .29324 |
| 24245 | .23526 |
| 24251 | .31304 |
| 24252 | .29258 |
| 24253 | .26621 |
| 24254 | .11299 |
| 24255 | .05501 |
| 24311 | .75037 |
| 24312 | .72991 |
| 24313 | .70354 |
| 24314 | .55032 |
| 24315 | .49234 |
| 24321 | .72839 |
| 24322 | .70793 |
| 24323 | .68156 |
| 24324 | .52834 |
| 24325 | .47036 |
| 24331 | .70333 |
| 24332 | .68287 |
| 24333 | .6565  |
| 24334 | .50328 |
| 24335 | .4453  |
| 24341 | .48663 |
| 24342 | .46617 |
| 24343 | .4398  |
| 24344 | .28658 |
| 24345 | .2286  |
| 24351 | .30638 |
| 24352 | .28592 |
| 24353 | .25955 |

|       |         |
|-------|---------|
| 24354 | .10633  |
| 24355 | .04835  |
| 24411 | .63327  |
| 24412 | .61281  |
| 24413 | .58644  |
| 24414 | .43322  |
| 24415 | .37524  |
| 24421 | .61129  |
| 24422 | .59083  |
| 24423 | .56446  |
| 24424 | .41124  |
| 24425 | .35326  |
| 24431 | .58623  |
| 24432 | .56577  |
| 24433 | .5394   |
| 24434 | .38618  |
| 24435 | .3282   |
| 24441 | .36953  |
| 24442 | .34907  |
| 24443 | .3227   |
| 24444 | .16948  |
| 24445 | .1115   |
| 24451 | .18928  |
| 24452 | .16882  |
| 24453 | .14245  |
| 24454 | -.01077 |
| 24455 | -.06875 |
| 24511 | .55011  |
| 24512 | .52965  |
| 24513 | .50328  |
| 24514 | .35006  |
| 24515 | .29208  |
| 24521 | .52813  |
| 24522 | .50767  |
| 24523 | .4813   |
| 24524 | .32808  |
| 24525 | .2701   |
| 24531 | .50307  |
| 24532 | .48261  |
| 24533 | .45624  |
| 24534 | .30302  |
| 24535 | .24504  |
| 24541 | .28637  |

|       |         |
|-------|---------|
| 24542 | .26591  |
| 24543 | .23954  |
| 24544 | .08632  |
| 24545 | .02834  |
| 24551 | .10612  |
| 24552 | .08566  |
| 24553 | .05929  |
| 24554 | -.09393 |
| 24555 | -.15191 |
| 25111 | .70408  |
| 25112 | .68362  |
| 25113 | .65725  |
| 25114 | .50403  |
| 25115 | .44605  |
| 25121 | .6821   |
| 25122 | .66164  |
| 25123 | .63527  |
| 25124 | .48205  |
| 25125 | .42407  |
| 25131 | .65704  |
| 25132 | .63658  |
| 25133 | .61021  |
| 25134 | .45699  |
| 25135 | .39901  |
| 25141 | .44034  |
| 25142 | .41988  |
| 25143 | .39351  |
| 25144 | .24029  |
| 25145 | .18231  |
| 25151 | .26009  |
| 25152 | .23963  |
| 25153 | .21326  |
| 25154 | .06004  |
| 25155 | .00206  |
| 25211 | .67095  |
| 25212 | .65049  |
| 25213 | .62412  |
| 25214 | .4709   |
| 25215 | .41292  |
| 25221 | .64897  |
| 25222 | .62851  |
| 25223 | .60214  |
| 25224 | .44892  |

|       |         |
|-------|---------|
| 25225 | .39094  |
| 25231 | .62391  |
| 25232 | .60345  |
| 25233 | .57708  |
| 25234 | .42386  |
| 25235 | .36588  |
| 25241 | .40721  |
| 25242 | .38675  |
| 25243 | .36038  |
| 25244 | .20716  |
| 25245 | .14918  |
| 25251 | .22696  |
| 25252 | .2065   |
| 25253 | .18013  |
| 25254 | .02691  |
| 25255 | -.03107 |
| 25311 | .66429  |
| 25312 | .64383  |
| 25313 | .61746  |
| 25314 | .46424  |
| 25315 | .40626  |
| 25321 | .64231  |
| 25322 | .62185  |
| 25323 | .59548  |
| 25324 | .44226  |
| 25325 | .38428  |
| 25331 | .61725  |
| 25332 | .59679  |
| 25333 | .57042  |
| 25334 | .4172   |
| 25335 | .35922  |
| 25341 | .40055  |
| 25342 | .38009  |
| 25343 | .35372  |
| 25344 | .2005   |
| 25345 | .14252  |
| 25351 | .2203   |
| 25352 | .19984  |
| 25353 | .17347  |
| 25354 | .02025  |
| 25355 | -.03773 |
| 25411 | .54719  |
| 25412 | .52673  |

|       |         |
|-------|---------|
| 25413 | .50036  |
| 25414 | .34714  |
| 25415 | .28916  |
| 25421 | .52521  |
| 25422 | .50475  |
| 25423 | .47838  |
| 25424 | .32516  |
| 25425 | .26718  |
| 25431 | .50015  |
| 25432 | .47969  |
| 25433 | .45332  |
| 25434 | .3001   |
| 25435 | .24212  |
| 25441 | .28345  |
| 25442 | .26299  |
| 25443 | .23662  |
| 25444 | .0834   |
| 25445 | .02542  |
| 25451 | .1032   |
| 25452 | .08274  |
| 25453 | .05637  |
| 25454 | -.09685 |
| 25455 | -.15483 |
| 25511 | .46403  |
| 25512 | .44357  |
| 25513 | .4172   |
| 25514 | .26398  |
| 25515 | .206    |
| 25521 | .44205  |
| 25522 | .42159  |
| 25523 | .39522  |
| 25524 | .242    |
| 25525 | .18402  |
| 25531 | .41699  |
| 25532 | .39653  |
| 25533 | .37016  |
| 25534 | .21694  |
| 25535 | .15896  |
| 25541 | .20029  |
| 25542 | .17983  |
| 25543 | .15346  |
| 25544 | .00024  |
| 25545 | -.05774 |

|       |         |
|-------|---------|
| 25551 | .02004  |
| 25552 | -.00042 |
| 25553 | -.02679 |
| 25554 | -.18001 |
| 25555 | -.23799 |
| 31111 | .95226  |
| 31112 | .9318   |
| 31113 | .90543  |
| 31114 | .75221  |
| 31115 | .69423  |
| 31121 | .93028  |
| 31122 | .90982  |
| 31123 | .88345  |
| 31124 | .73023  |
| 31125 | .67225  |
| 31131 | .90522  |
| 31132 | .88476  |
| 31133 | .85839  |
| 31134 | .70517  |
| 31135 | .64719  |
| 31141 | .68852  |
| 31142 | .66806  |
| 31143 | .64169  |
| 31144 | .48847  |
| 31145 | .43049  |
| 31151 | .50827  |
| 31152 | .48781  |
| 31153 | .46144  |
| 31154 | .30822  |
| 31155 | .25024  |
| 31211 | .91913  |
| 31212 | .89867  |
| 31213 | .8723   |
| 31214 | .71908  |
| 31215 | .6611   |
| 31221 | .89715  |
| 31222 | .87669  |
| 31223 | .85032  |
| 31224 | .6971   |
| 31225 | .63912  |
| 31231 | .87209  |
| 31232 | .85163  |
| 31233 | .82526  |

|       |        |
|-------|--------|
| 31234 | .67204 |
| 31235 | .61406 |
| 31241 | .65539 |
| 31242 | .63493 |
| 31243 | .60856 |
| 31244 | .45534 |
| 31245 | .39736 |
| 31251 | .47514 |
| 31252 | .45468 |
| 31253 | .42831 |
| 31254 | .27509 |
| 31255 | .21711 |
| 31311 | .91247 |
| 31312 | .89201 |
| 31313 | .86564 |
| 31314 | .71242 |
| 31315 | .65444 |
| 31321 | .89049 |
| 31322 | .87003 |
| 31323 | .84366 |
| 31324 | .69044 |
| 31325 | .63246 |
| 31331 | .86543 |
| 31332 | .84497 |
| 31333 | .8186  |
| 31334 | .66538 |
| 31335 | .6074  |
| 31341 | .64873 |
| 31342 | .62827 |
| 31343 | .6019  |
| 31344 | .44868 |
| 31345 | .3907  |
| 31351 | .46848 |
| 31352 | .44802 |
| 31353 | .42165 |
| 31354 | .26843 |
| 31355 | .21045 |
| 31411 | .79537 |
| 31412 | .77491 |
| 31413 | .74854 |
| 31414 | .59532 |
| 31415 | .53734 |
| 31421 | .77339 |



|       |        |
|-------|--------|
| 31422 | .75293 |
| 31423 | .72656 |
| 31424 | .57334 |
| 31425 | .51536 |
| 31431 | .74833 |
| 31432 | .72787 |
| 31433 | .7015  |
| 31434 | .54828 |
| 31435 | .4903  |
| 31441 | .53163 |
| 31442 | .51117 |
| 31443 | .4848  |
| 31444 | .33158 |
| 31445 | .2736  |
| 31451 | .35138 |
| 31452 | .33092 |
| 31453 | .30455 |
| 31454 | .15133 |
| 31455 | .09335 |
| 31511 | .71221 |
| 31512 | .69175 |
| 31513 | .66538 |
| 31514 | .51216 |
| 31515 | .45418 |
| 31521 | .69023 |
| 31522 | .66977 |
| 31523 | .6434  |
| 31524 | .49018 |
| 31525 | .4322  |
| 31531 | .66517 |
| 31532 | .64471 |
| 31533 | .61834 |
| 31534 | .46512 |
| 31535 | .40714 |
| 31541 | .44847 |
| 31542 | .42801 |
| 31543 | .40164 |
| 31544 | .24842 |
| 31545 | .19044 |
| 31551 | .26822 |
| 31552 | .24776 |
| 31553 | .22139 |
| 31554 | .06817 |

|       |        |
|-------|--------|
| 31555 | .01019 |
| 32111 | .9157  |
| 32112 | .89524 |
| 32113 | .86887 |
| 32114 | .71565 |
| 32115 | .65767 |
| 32121 | .89372 |
| 32122 | .87326 |
| 32123 | .84689 |
| 32124 | .69367 |
| 32125 | .63569 |
| 32131 | .86866 |
| 32132 | .8482  |
| 32133 | .82183 |
| 32134 | .66861 |
| 32135 | .61063 |
| 32141 | .65196 |
| 32142 | .6315  |
| 32143 | .60513 |
| 32144 | .45191 |
| 32145 | .39393 |
| 32151 | .47171 |
| 32152 | .45125 |
| 32153 | .42488 |
| 32154 | .27166 |
| 32155 | .21368 |
| 32211 | .88257 |
| 32212 | .86211 |
| 32213 | .83574 |
| 32214 | .68252 |
| 32215 | .62454 |
| 32221 | .86059 |
| 32222 | .84013 |
| 32223 | .81376 |
| 32224 | .66054 |
| 32225 | .60256 |
| 32231 | .83553 |
| 32232 | .81507 |
| 32233 | .7887  |
| 32234 | .63548 |
| 32235 | .5775  |
| 32241 | .61883 |
| 32242 | .59837 |

|       |        |
|-------|--------|
| 32243 | .572   |
| 32244 | .41878 |
| 32245 | .3608  |
| 32251 | .43858 |
| 32252 | .41812 |
| 32253 | .39175 |
| 32254 | .23853 |
| 32255 | .18055 |
| 32311 | .87591 |
| 32312 | .85545 |
| 32313 | .82908 |
| 32314 | .67586 |
| 32315 | .61788 |
| 32321 | .85393 |
| 32322 | .83347 |
| 32323 | .8071  |
| 32324 | .65388 |
| 32325 | .5959  |
| 32331 | .82887 |
| 32332 | .80841 |
| 32333 | .78204 |
| 32334 | .62882 |
| 32335 | .57084 |
| 32341 | .61217 |
| 32342 | .59171 |
| 32343 | .56534 |
| 32344 | .41212 |
| 32345 | .35414 |
| 32351 | .43192 |
| 32352 | .41146 |
| 32353 | .38509 |
| 32354 | .23187 |
| 32355 | .17389 |
| 32411 | .75881 |
| 32412 | .73835 |
| 32413 | .71198 |
| 32414 | .55876 |
| 32415 | .50078 |
| 32421 | .73683 |
| 32422 | .71637 |
| 32423 | .69    |
| 32424 | .53678 |
| 32425 | .4788  |

|       |         |
|-------|---------|
| 32431 | .71177  |
| 32432 | .69131  |
| 32433 | .66494  |
| 32434 | .51172  |
| 32435 | .45374  |
| 32441 | .49507  |
| 32442 | .47461  |
| 32443 | .44824  |
| 32444 | .29502  |
| 32445 | .23704  |
| 32451 | .31482  |
| 32452 | .29436  |
| 32453 | .26799  |
| 32454 | .11477  |
| 32455 | .05679  |
| 32511 | .67565  |
| 32512 | .65519  |
| 32513 | .62882  |
| 32514 | .4756   |
| 32515 | .41762  |
| 32521 | .65367  |
| 32522 | .63321  |
| 32523 | .60684  |
| 32524 | .45362  |
| 32525 | .39564  |
| 32531 | .62861  |
| 32532 | .60815  |
| 32533 | .58178  |
| 32534 | .42856  |
| 32535 | .37058  |
| 32541 | .41191  |
| 32542 | .39145  |
| 32543 | .36508  |
| 32544 | .21186  |
| 32545 | .15388  |
| 32551 | .23166  |
| 32552 | .2112   |
| 32553 | .18483  |
| 32554 | .03161  |
| 32555 | -.02637 |
| 33111 | .90148  |
| 33112 | .88102  |
| 33113 | .85465  |

|       |        |
|-------|--------|
| 33114 | .70143 |
| 33115 | .64345 |
| 33121 | .8795  |
| 33122 | .85904 |
| 33123 | .83267 |
| 33124 | .67945 |
| 33125 | .62147 |
| 33131 | .85444 |
| 33132 | .83398 |
| 33133 | .80761 |
| 33134 | .65439 |
| 33135 | .59641 |
| 33141 | .63774 |
| 33142 | .61728 |
| 33143 | .59091 |
| 33144 | .43769 |
| 33145 | .37971 |
| 33151 | .45749 |
| 33152 | .43703 |
| 33153 | .41066 |
| 33154 | .25744 |
| 33155 | .19946 |
| 33211 | .86835 |
| 33212 | .84789 |
| 33213 | .82152 |
| 33214 | .6683  |
| 33215 | .61032 |
| 33221 | .84637 |
| 33222 | .82591 |
| 33223 | .79954 |
| 33224 | .64632 |
| 33225 | .58834 |
| 33231 | .82131 |
| 33232 | .80085 |
| 33233 | .77448 |
| 33234 | .62126 |
| 33235 | .56328 |
| 33241 | .60461 |
| 33242 | .58415 |
| 33243 | .55778 |
| 33244 | .40456 |
| 33245 | .34658 |
| 33251 | .42436 |

|       |        |
|-------|--------|
| 33252 | .4039  |
| 33253 | .37753 |
| 33254 | .22431 |
| 33255 | .16633 |
| 33311 | .86169 |
| 33312 | .84123 |
| 33313 | .81486 |
| 33314 | .66164 |
| 33315 | .60366 |
| 33321 | .83971 |
| 33322 | .81925 |
| 33323 | .79288 |
| 33324 | .63966 |
| 33325 | .58168 |
| 33331 | .81465 |
| 33332 | .79419 |
| 33333 | .76782 |
| 33334 | .6146  |
| 33335 | .55662 |
| 33341 | .59795 |
| 33342 | .57749 |
| 33343 | .55112 |
| 33344 | .3979  |
| 33345 | .33992 |
| 33351 | .4177  |
| 33352 | .39724 |
| 33353 | .37087 |
| 33354 | .21765 |
| 33355 | .15967 |
| 33411 | .74459 |
| 33412 | .72413 |
| 33413 | .69776 |
| 33414 | .54454 |
| 33415 | .48656 |
| 33421 | .72261 |
| 33422 | .70215 |
| 33423 | .67578 |
| 33424 | .52256 |
| 33425 | .46458 |
| 33431 | .69755 |
| 33432 | .67709 |
| 33433 | .65072 |
| 33434 | .4975  |

|       |         |
|-------|---------|
| 33435 | .43952  |
| 33441 | .48085  |
| 33442 | .46039  |
| 33443 | .43402  |
| 33444 | .2808   |
| 33445 | .22282  |
| 33451 | .3006   |
| 33452 | .28014  |
| 33453 | .25377  |
| 33454 | .10055  |
| 33455 | .04257  |
| 33511 | .66143  |
| 33512 | .64097  |
| 33513 | .6146   |
| 33514 | .46138  |
| 33515 | .4034   |
| 33521 | .63945  |
| 33522 | .61899  |
| 33523 | .59262  |
| 33524 | .4394   |
| 33525 | .38142  |
| 33531 | .61439  |
| 33532 | .59393  |
| 33533 | .56756  |
| 33534 | .41434  |
| 33535 | .35636  |
| 33541 | .39769  |
| 33542 | .37723  |
| 33543 | .35086  |
| 33544 | .19764  |
| 33545 | .13966  |
| 33551 | .21744  |
| 33552 | .19698  |
| 33553 | .17061  |
| 33554 | .01739  |
| 33555 | -.04059 |
| 34111 | .78001  |
| 34112 | .75955  |
| 34113 | .73318  |
| 34114 | .57996  |
| 34115 | .52198  |
| 34121 | .75803  |
| 34122 | .73757  |

|       |        |
|-------|--------|
| 34123 | .7112  |
| 34124 | .55798 |
| 34125 | .5     |
| 34131 | .73297 |
| 34132 | .71251 |
| 34133 | .68614 |
| 34134 | .53292 |
| 34135 | .47494 |
| 34141 | .51627 |
| 34142 | .49581 |
| 34143 | .46944 |
| 34144 | .31622 |
| 34145 | .25824 |
| 34151 | .33602 |
| 34152 | .31556 |
| 34153 | .28919 |
| 34154 | .13597 |
| 34155 | .07799 |
| 34211 | .74688 |
| 34212 | .72642 |
| 34213 | .70005 |
| 34214 | .54683 |
| 34215 | .48885 |
| 34221 | .7249  |
| 34222 | .70444 |
| 34223 | .67807 |
| 34224 | .52485 |
| 34225 | .46687 |
| 34231 | .69984 |
| 34232 | .67938 |
| 34233 | .65301 |
| 34234 | .49979 |
| 34235 | .44181 |
| 34241 | .48314 |
| 34242 | .46268 |
| 34243 | .43631 |
| 34244 | .28309 |
| 34245 | .22511 |
| 34251 | .30289 |
| 34252 | .28243 |
| 34253 | .25606 |
| 34254 | .10284 |
| 34255 | .04486 |



|       |        |
|-------|--------|
| 34311 | .74022 |
| 34312 | .71976 |
| 34313 | .69339 |
| 34314 | .54017 |
| 34315 | .48219 |
| 34321 | .71824 |
| 34322 | .69778 |
| 34323 | .67141 |
| 34324 | .51819 |
| 34325 | .46021 |
| 34331 | .69318 |
| 34332 | .67272 |
| 34333 | .64635 |
| 34334 | .49313 |
| 34335 | .43515 |
| 34341 | .47648 |
| 34342 | .45602 |
| 34343 | .42965 |
| 34344 | .27643 |
| 34345 | .21845 |
| 34351 | .29623 |
| 34352 | .27577 |
| 34353 | .2494  |
| 34354 | .09618 |
| 34355 | .0382  |
| 34411 | .62312 |
| 34412 | .60266 |
| 34413 | .57629 |
| 34414 | .42307 |
| 34415 | .36509 |
| 34421 | .60114 |
| 34422 | .58068 |
| 34423 | .55431 |
| 34424 | .40109 |
| 34425 | .34311 |
| 34431 | .57608 |
| 34432 | .55562 |
| 34433 | .52925 |
| 34434 | .37603 |
| 34435 | .31805 |
| 34441 | .35938 |
| 34442 | .33892 |
| 34443 | .31255 |

|       |         |
|-------|---------|
| 34444 | .15933  |
| 34445 | .10135  |
| 34451 | .17913  |
| 34452 | .15867  |
| 34453 | .1323   |
| 34454 | -.02092 |
| 34455 | -.0789  |
| 34511 | .53996  |
| 34512 | .5195   |
| 34513 | .49313  |
| 34514 | .33991  |
| 34515 | .28193  |
| 34521 | .51798  |
| 34522 | .49752  |
| 34523 | .47115  |
| 34524 | .31793  |
| 34525 | .25995  |
| 34531 | .49292  |
| 34532 | .47246  |
| 34533 | .44609  |
| 34534 | .29287  |
| 34535 | .23489  |
| 34541 | .27622  |
| 34542 | .25576  |
| 34543 | .22939  |
| 34544 | .07617  |
| 34545 | .01819  |
| 34551 | .09597  |
| 34552 | .07551  |
| 34553 | .04914  |
| 34554 | -.10408 |
| 34555 | -.16206 |
| 35111 | .69393  |
| 35112 | .67347  |
| 35113 | .6471   |
| 35114 | .49388  |
| 35115 | .4359   |
| 35121 | .67195  |
| 35122 | .65149  |
| 35123 | .62512  |
| 35124 | .4719   |
| 35125 | .41392  |
| 35131 | .64689  |

|       |         |
|-------|---------|
| 35132 | .62643  |
| 35133 | .60006  |
| 35134 | .44684  |
| 35135 | .38886  |
| 35141 | .43019  |
| 35142 | .40973  |
| 35143 | .38336  |
| 35144 | .23014  |
| 35145 | .17216  |
| 35151 | .24994  |
| 35152 | .22948  |
| 35153 | .20311  |
| 35154 | .04989  |
| 35155 | -.00809 |
| 35211 | .6608   |
| 35212 | .64034  |
| 35213 | .61397  |
| 35214 | .46075  |
| 35215 | .40277  |
| 35221 | .63882  |
| 35222 | .61836  |
| 35223 | .59199  |
| 35224 | .43877  |
| 35225 | .38079  |
| 35231 | .61376  |
| 35232 | .5933   |
| 35233 | .56693  |
| 35234 | .41371  |
| 35235 | .35573  |
| 35241 | .39706  |
| 35242 | .3766   |
| 35243 | .35023  |
| 35244 | .19701  |
| 35245 | .13903  |
| 35251 | .21681  |
| 35252 | .19635  |
| 35253 | .16998  |
| 35254 | .01676  |
| 35255 | -.04122 |
| 35311 | .65414  |
| 35312 | .63368  |
| 35313 | .60731  |
| 35314 | .45409  |

|       |         |
|-------|---------|
| 35315 | .39611  |
| 35321 | .63216  |
| 35322 | .6117   |
| 35323 | .58533  |
| 35324 | .43211  |
| 35325 | .37413  |
| 35331 | .6071   |
| 35332 | .58664  |
| 35333 | .56027  |
| 35334 | .40705  |
| 35335 | .34907  |
| 35341 | .3904   |
| 35342 | .36994  |
| 35343 | .34357  |
| 35344 | .19035  |
| 35345 | .13237  |
| 35351 | .21015  |
| 35352 | .18969  |
| 35353 | .16332  |
| 35354 | .0101   |
| 35355 | -.04788 |
| 35411 | .53704  |
| 35412 | .51658  |
| 35413 | .49021  |
| 35414 | .33699  |
| 35415 | .27901  |
| 35421 | .51506  |
| 35422 | .4946   |
| 35423 | .46823  |
| 35424 | .31501  |
| 35425 | .25703  |
| 35431 | .49     |
| 35432 | .46954  |
| 35433 | .44317  |
| 35434 | .28995  |
| 35435 | .23197  |
| 35441 | .2733   |
| 35442 | .25284  |
| 35443 | .22647  |
| 35444 | .07325  |
| 35445 | .01527  |
| 35451 | .09305  |
| 35452 | .07259  |

|       |         |
|-------|---------|
| 35453 | .04622  |
| 35454 | -.107   |
| 35455 | -.16498 |
| 35511 | .45388  |
| 35512 | .43342  |
| 35513 | .40705  |
| 35514 | .25383  |
| 35515 | .19585  |
| 35521 | .4319   |
| 35522 | .41144  |
| 35523 | .38507  |
| 35524 | .23185  |
| 35525 | .17387  |
| 35531 | .40684  |
| 35532 | .38638  |
| 35533 | .36001  |
| 35534 | .20679  |
| 35535 | .14881  |
| 35541 | .19014  |
| 35542 | .16968  |
| 35543 | .14331  |
| 35544 | -.00991 |
| 35545 | -.06789 |
| 35551 | .00989  |
| 35552 | -.01057 |
| 35553 | -.03694 |
| 35554 | -.19016 |
| 35555 | -.24814 |
| 41111 | .82051  |
| 41112 | .80005  |
| 41113 | .77368  |
| 41114 | .62046  |
| 41115 | .56248  |
| 41121 | .79853  |
| 41122 | .77807  |
| 41123 | .7517   |
| 41124 | .59848  |
| 41125 | .5405   |
| 41131 | .77347  |
| 41132 | .75301  |
| 41133 | .72664  |
| 41134 | .57342  |
| 41135 | .51544  |

|       |        |
|-------|--------|
| 41141 | .55677 |
| 41142 | .53631 |
| 41143 | .50994 |
| 41144 | .35672 |
| 41145 | .29874 |
| 41151 | .37652 |
| 41152 | .35606 |
| 41153 | .32969 |
| 41154 | .17647 |
| 41155 | .11849 |
| 41211 | .78738 |
| 41212 | .76692 |
| 41213 | .74055 |
| 41214 | .58733 |
| 41215 | .52935 |
| 41221 | .7654  |
| 41222 | .74494 |
| 41223 | .71857 |
| 41224 | .56535 |
| 41225 | .50737 |
| 41231 | .74034 |
| 41232 | .71988 |
| 41233 | .69351 |
| 41234 | .54029 |
| 41235 | .48231 |
| 41241 | .52364 |
| 41242 | .50318 |
| 41243 | .47681 |
| 41244 | .32359 |
| 41245 | .26561 |
| 41251 | .34339 |
| 41252 | .32293 |
| 41253 | .29656 |
| 41254 | .14334 |
| 41255 | .08536 |
| 41311 | .78072 |
| 41312 | .76026 |
| 41313 | .73389 |
| 41314 | .58067 |
| 41315 | .52269 |
| 41321 | .75874 |
| 41322 | .73828 |
| 41323 | .71191 |

|       |        |
|-------|--------|
| 41324 | .55869 |
| 41325 | .50071 |
| 41331 | .73368 |
| 41332 | .71322 |
| 41333 | .68685 |
| 41334 | .53363 |
| 41335 | .47565 |
| 41341 | .51698 |
| 41342 | .49652 |
| 41343 | .47015 |
| 41344 | .31693 |
| 41345 | .25895 |
| 41351 | .33673 |
| 41352 | .31627 |
| 41353 | .2899  |
| 41354 | .13668 |
| 41355 | .0787  |
| 41411 | .66362 |
| 41412 | .64316 |
| 41413 | .61679 |
| 41414 | .46357 |
| 41415 | .40559 |
| 41421 | .64164 |
| 41422 | .62118 |
| 41423 | .59481 |
| 41424 | .44159 |
| 41425 | .38361 |
| 41431 | .61658 |
| 41432 | .59612 |
| 41433 | .56975 |
| 41434 | .41653 |
| 41435 | .35855 |
| 41441 | .39988 |
| 41442 | .37942 |
| 41443 | .35305 |
| 41444 | .19983 |
| 41445 | .14185 |
| 41451 | .21963 |
| 41452 | .19917 |
| 41453 | .1728  |
| 41454 | .01958 |
| 41455 | -.0384 |
| 41511 | .58046 |

|       |         |
|-------|---------|
| 41512 | .56     |
| 41513 | .53363  |
| 41514 | .38041  |
| 41515 | .32243  |
| 41521 | .55848  |
| 41522 | .53802  |
| 41523 | .51165  |
| 41524 | .35843  |
| 41525 | .30045  |
| 41531 | .53342  |
| 41532 | .51296  |
| 41533 | .48659  |
| 41534 | .33337  |
| 41535 | .27539  |
| 41541 | .31672  |
| 41542 | .29626  |
| 41543 | .26989  |
| 41544 | .11667  |
| 41545 | .05869  |
| 41551 | .13647  |
| 41552 | .11601  |
| 41553 | .08964  |
| 41554 | -.06358 |
| 41555 | -.12156 |
| 42111 | .78395  |
| 42112 | .76349  |
| 42113 | .73712  |
| 42114 | .5839   |
| 42115 | .52592  |
| 42121 | .76197  |
| 42122 | .74151  |
| 42123 | .71514  |
| 42124 | .56192  |
| 42125 | .50394  |
| 42131 | .73691  |
| 42132 | .71645  |
| 42133 | .69008  |
| 42134 | .53686  |
| 42135 | .47888  |
| 42141 | .52021  |
| 42142 | .49975  |
| 42143 | .47338  |
| 42144 | .32016  |



|       |        |
|-------|--------|
| 42145 | .26218 |
| 42151 | .33996 |
| 42152 | .3195  |
| 42153 | .29313 |
| 42154 | .13991 |
| 42155 | .08193 |
| 42211 | .75082 |
| 42212 | .73036 |
| 42213 | .70399 |
| 42214 | .55077 |
| 42215 | .49279 |
| 42221 | .72884 |
| 42222 | .70838 |
| 42223 | .68201 |
| 42224 | .52879 |
| 42225 | .47081 |
| 42231 | .70378 |
| 42232 | .68332 |
| 42233 | .65695 |
| 42234 | .50373 |
| 42235 | .44575 |
| 42241 | .48708 |
| 42242 | .46662 |
| 42243 | .44025 |
| 42244 | .28703 |
| 42245 | .22905 |
| 42251 | .30683 |
| 42252 | .28637 |
| 42253 | .26    |
| 42254 | .10678 |
| 42255 | .0488  |
| 42311 | .74416 |
| 42312 | .7237  |
| 42313 | .69733 |
| 42314 | .54411 |
| 42315 | .48613 |
| 42321 | .72218 |
| 42322 | .70172 |
| 42323 | .67535 |
| 42324 | .52213 |
| 42325 | .46415 |
| 42331 | .69712 |
| 42332 | .67666 |

|       |         |
|-------|---------|
| 42333 | .65029  |
| 42334 | .49707  |
| 42335 | .43909  |
| 42341 | .48042  |
| 42342 | .45996  |
| 42343 | .43359  |
| 42344 | .28037  |
| 42345 | .22239  |
| 42351 | .30017  |
| 42352 | .27971  |
| 42353 | .25334  |
| 42354 | .10012  |
| 42355 | .04214  |
| 42411 | .62706  |
| 42412 | .6066   |
| 42413 | .58023  |
| 42414 | .42701  |
| 42415 | .36903  |
| 42421 | .60508  |
| 42422 | .58462  |
| 42423 | .55825  |
| 42424 | .40503  |
| 42425 | .34705  |
| 42431 | .58002  |
| 42432 | .55956  |
| 42433 | .53319  |
| 42434 | .37997  |
| 42435 | .32199  |
| 42441 | .36332  |
| 42442 | .34286  |
| 42443 | .31649  |
| 42444 | .16327  |
| 42445 | .10529  |
| 42451 | .18307  |
| 42452 | .16261  |
| 42453 | .13624  |
| 42454 | -.01698 |
| 42455 | -.07496 |
| 42511 | .5439   |
| 42512 | .52344  |
| 42513 | .49707  |
| 42514 | .34385  |
| 42515 | .28587  |

|       |         |
|-------|---------|
| 42521 | .52192  |
| 42522 | .50146  |
| 42523 | .47509  |
| 42524 | .32187  |
| 42525 | .26389  |
| 42531 | .49686  |
| 42532 | .4764   |
| 42533 | .45003  |
| 42534 | .29681  |
| 42535 | .23883  |
| 42541 | .28016  |
| 42542 | .2597   |
| 42543 | .23333  |
| 42544 | .08011  |
| 42545 | .02213  |
| 42551 | .09991  |
| 42552 | .07945  |
| 42553 | .05308  |
| 42554 | -.10014 |
| 42555 | -.15812 |
| 43111 | .76973  |
| 43112 | .74927  |
| 43113 | .7229   |
| 43114 | .56968  |
| 43115 | .5117   |
| 43121 | .74775  |
| 43122 | .72729  |
| 43123 | .70092  |
| 43124 | .5477   |
| 43125 | .48972  |
| 43131 | .72269  |
| 43132 | .70223  |
| 43133 | .67586  |
| 43134 | .52264  |
| 43135 | .46466  |
| 43141 | .50599  |
| 43142 | .48553  |
| 43143 | .45916  |
| 43144 | .30594  |
| 43145 | .24796  |
| 43151 | .32574  |
| 43152 | .30528  |
| 43153 | .27891  |

|       |        |
|-------|--------|
| 43154 | .12569 |
| 43155 | .06771 |
| 43211 | .7366  |
| 43212 | .71614 |
| 43213 | .68977 |
| 43214 | .53655 |
| 43215 | .47857 |
| 43221 | .71462 |
| 43222 | .69416 |
| 43223 | .66779 |
| 43224 | .51457 |
| 43225 | .45659 |
| 43231 | .68956 |
| 43232 | .6691  |
| 43233 | .64273 |
| 43234 | .48951 |
| 43235 | .43153 |
| 43241 | .47286 |
| 43242 | .4524  |
| 43243 | .42603 |
| 43244 | .27281 |
| 43245 | .21483 |
| 43251 | .29261 |
| 43252 | .27215 |
| 43253 | .24578 |
| 43254 | .09256 |
| 43255 | .03458 |
| 43311 | .72994 |
| 43312 | .70948 |
| 43313 | .68311 |
| 43314 | .52989 |
| 43315 | .47191 |
| 43321 | .70796 |
| 43322 | .6875  |
| 43323 | .66113 |
| 43324 | .50791 |
| 43325 | .44993 |
| 43331 | .6829  |
| 43332 | .66244 |
| 43333 | .63607 |
| 43334 | .48285 |
| 43335 | .42487 |
| 43341 | .4662  |

|       |         |
|-------|---------|
| 43342 | .44574  |
| 43343 | .41937  |
| 43344 | .26615  |
| 43345 | .20817  |
| 43351 | .28595  |
| 43352 | .26549  |
| 43353 | .23912  |
| 43354 | .0859   |
| 43355 | .02792  |
| 43411 | .61284  |
| 43412 | .59238  |
| 43413 | .56601  |
| 43414 | .41279  |
| 43415 | .35481  |
| 43421 | .59086  |
| 43422 | .5704   |
| 43423 | .54403  |
| 43424 | .39081  |
| 43425 | .33283  |
| 43431 | .5658   |
| 43432 | .54534  |
| 43433 | .51897  |
| 43434 | .36575  |
| 43435 | .30777  |
| 43441 | .3491   |
| 43442 | .32864  |
| 43443 | .30227  |
| 43444 | .14905  |
| 43445 | .09107  |
| 43451 | .16885  |
| 43452 | .14839  |
| 43453 | .12202  |
| 43454 | -.0312  |
| 43455 | -.08918 |
| 43511 | .52968  |
| 43512 | .50922  |
| 43513 | .48285  |
| 43514 | .32963  |
| 43515 | .27165  |
| 43521 | .5077   |
| 43522 | .48724  |
| 43523 | .46087  |
| 43524 | .30765  |

|       |         |
|-------|---------|
| 43525 | .24967  |
| 43531 | .48264  |
| 43532 | .46218  |
| 43533 | .43581  |
| 43534 | .28259  |
| 43535 | .22461  |
| 43541 | .26594  |
| 43542 | .24548  |
| 43543 | .21911  |
| 43544 | .06589  |
| 43545 | .00791  |
| 43551 | .08569  |
| 43552 | .06523  |
| 43553 | .03886  |
| 43554 | -.11436 |
| 43555 | -.17234 |
| 44111 | .64826  |
| 44112 | .6278   |
| 44113 | .60143  |
| 44114 | .44821  |
| 44115 | .39023  |
| 44121 | .62628  |
| 44122 | .60582  |
| 44123 | .57945  |
| 44124 | .42623  |
| 44125 | .36825  |
| 44131 | .60122  |
| 44132 | .58076  |
| 44133 | .55439  |
| 44134 | .40117  |
| 44135 | .34319  |
| 44141 | .38452  |
| 44142 | .36406  |
| 44143 | .33769  |
| 44144 | .18447  |
| 44145 | .12649  |
| 44151 | .20427  |
| 44152 | .18381  |
| 44153 | .15744  |
| 44154 | .00422  |
| 44155 | -.05376 |
| 44211 | .61513  |
| 44212 | .59467  |

|       |         |
|-------|---------|
| 44213 | .5683   |
| 44214 | .41508  |
| 44215 | .3571   |
| 44221 | .59315  |
| 44222 | .57269  |
| 44223 | .54632  |
| 44224 | .3931   |
| 44225 | .33512  |
| 44231 | .56809  |
| 44232 | .54763  |
| 44233 | .52126  |
| 44234 | .36804  |
| 44235 | .31006  |
| 44241 | .35139  |
| 44242 | .33093  |
| 44243 | .30456  |
| 44244 | .15134  |
| 44245 | .09336  |
| 44251 | .17114  |
| 44252 | .15068  |
| 44253 | .12431  |
| 44254 | -.02891 |
| 44255 | -.08689 |
| 44311 | .60847  |
| 44312 | .58801  |
| 44313 | .56164  |
| 44314 | .40842  |
| 44315 | .35044  |
| 44321 | .58649  |
| 44322 | .56603  |
| 44323 | .53966  |
| 44324 | .38644  |
| 44325 | .32846  |
| 44331 | .56143  |
| 44332 | .54097  |
| 44333 | .5146   |
| 44334 | .36138  |
| 44335 | .3034   |
| 44341 | .34473  |
| 44342 | .32427  |
| 44343 | .2979   |
| 44344 | .14468  |
| 44345 | .0867   |

|       |         |
|-------|---------|
| 44351 | .16448  |
| 44352 | .14402  |
| 44353 | .11765  |
| 44354 | -.03557 |
| 44355 | -.09355 |
| 44411 | .49137  |
| 44412 | .47091  |
| 44413 | .44454  |
| 44414 | .29132  |
| 44415 | .23334  |
| 44421 | .46939  |
| 44422 | .44893  |
| 44423 | .42256  |
| 44424 | .26934  |
| 44425 | .21136  |
| 44431 | .44433  |
| 44432 | .42387  |
| 44433 | .3975   |
| 44434 | .24428  |
| 44435 | .1863   |
| 44441 | .22763  |
| 44442 | .20717  |
| 44443 | .1808   |
| 44444 | .02758  |
| 44445 | -.0304  |
| 44451 | .04738  |
| 44452 | .02692  |
| 44453 | .00055  |
| 44454 | -.15267 |
| 44455 | -.21065 |
| 44511 | .40821  |
| 44512 | .38775  |
| 44513 | .36138  |
| 44514 | .20816  |
| 44515 | .15018  |
| 44521 | .38623  |
| 44522 | .36577  |
| 44523 | .3394   |
| 44524 | .18618  |
| 44525 | .1282   |
| 44531 | .36117  |
| 44532 | .34071  |
| 44533 | .31434  |



|       |         |
|-------|---------|
| 44534 | .16112  |
| 44535 | .10314  |
| 44541 | .14447  |
| 44542 | .12401  |
| 44543 | .09764  |
| 44544 | -.05558 |
| 44545 | -.11356 |
| 44551 | -.03578 |
| 44552 | -.05624 |
| 44553 | -.08261 |
| 44554 | -.23583 |
| 44555 | -.29381 |
| 45111 | .56218  |
| 45112 | .54172  |
| 45113 | .51535  |
| 45114 | .36213  |
| 45115 | .30415  |
| 45121 | .5402   |
| 45122 | .51974  |
| 45123 | .49337  |
| 45124 | .34015  |
| 45125 | .28217  |
| 45131 | .51514  |
| 45132 | .49468  |
| 45133 | .46831  |
| 45134 | .31509  |
| 45135 | .25711  |
| 45141 | .29844  |
| 45142 | .27798  |
| 45143 | .25161  |
| 45144 | .09839  |
| 45145 | .04041  |
| 45151 | .11819  |
| 45152 | .09773  |
| 45153 | .07136  |
| 45154 | -.08186 |
| 45155 | -.13984 |
| 45211 | .52905  |
| 45212 | .50859  |
| 45213 | .48222  |
| 45214 | .329    |
| 45215 | .27102  |
| 45221 | .50707  |

|       |         |
|-------|---------|
| 45222 | .48661  |
| 45223 | .46024  |
| 45224 | .30702  |
| 45225 | .24904  |
| 45231 | .48201  |
| 45232 | .46155  |
| 45233 | .43518  |
| 45234 | .28196  |
| 45235 | .22398  |
| 45241 | .26531  |
| 45242 | .24485  |
| 45243 | .21848  |
| 45244 | .06526  |
| 45245 | .00728  |
| 45251 | .08506  |
| 45252 | .0646   |
| 45253 | .03823  |
| 45254 | -.11499 |
| 45255 | -.17297 |
| 45311 | .52239  |
| 45312 | .50193  |
| 45313 | .47556  |
| 45314 | .32234  |
| 45315 | .26436  |
| 45321 | .50041  |
| 45322 | .47995  |
| 45323 | .45358  |
| 45324 | .30036  |
| 45325 | .24238  |
| 45331 | .47535  |
| 45332 | .45489  |
| 45333 | .42852  |
| 45334 | .2753   |
| 45335 | .21732  |
| 45341 | .25865  |
| 45342 | .23819  |
| 45343 | .21182  |
| 45344 | .0586   |
| 45345 | .00062  |
| 45351 | .0784   |
| 45352 | .05794  |
| 45353 | .03157  |
| 45354 | -.12165 |

|       |         |
|-------|---------|
| 45355 | -.17963 |
| 45411 | .40529  |
| 45412 | .38483  |
| 45413 | .35846  |
| 45414 | .20524  |
| 45415 | .14726  |
| 45421 | .38331  |
| 45422 | .36285  |
| 45423 | .33648  |
| 45424 | .18326  |
| 45425 | .12528  |
| 45431 | .35825  |
| 45432 | .33779  |
| 45433 | .31142  |
| 45434 | .1582   |
| 45435 | .10022  |
| 45441 | .14155  |
| 45442 | .12109  |
| 45443 | .09472  |
| 45444 | -.0585  |
| 45445 | -.11648 |
| 45451 | -.0387  |
| 45452 | -.05916 |
| 45453 | -.08553 |
| 45454 | -.23875 |
| 45455 | -.29673 |
| 45511 | .32213  |
| 45512 | .30167  |
| 45513 | .2753   |
| 45514 | .12208  |
| 45515 | .0641   |
| 45521 | .30015  |
| 45522 | .27969  |
| 45523 | .25332  |
| 45524 | .1001   |
| 45525 | .04212  |
| 45531 | .27509  |
| 45532 | .25463  |
| 45533 | .22826  |
| 45534 | .07504  |
| 45535 | .01706  |
| 45541 | .05839  |
| 45542 | .03793  |

|       |         |
|-------|---------|
| 45543 | .01156  |
| 45544 | -.14166 |
| 45545 | -.19964 |
| 45551 | -.12186 |
| 45552 | -.14232 |
| 45553 | -.16869 |
| 45554 | -.32191 |
| 45555 | -.37989 |
| 51111 | .67491  |
| 51112 | .65445  |
| 51113 | .62808  |
| 51114 | .47486  |
| 51115 | .41688  |
| 51121 | .65293  |
| 51122 | .63247  |
| 51123 | .6061   |
| 51124 | .45288  |
| 51125 | .3949   |
| 51131 | .62787  |
| 51132 | .60741  |
| 51133 | .58104  |
| 51134 | .42782  |
| 51135 | .36984  |
| 51141 | .41117  |
| 51142 | .39071  |
| 51143 | .36434  |
| 51144 | .21112  |
| 51145 | .15314  |
| 51151 | .23092  |
| 51152 | .21046  |
| 51153 | .18409  |
| 51154 | .03087  |
| 51155 | -.02711 |
| 51211 | .64178  |
| 51212 | .62132  |
| 51213 | .59495  |
| 51214 | .44173  |
| 51215 | .38375  |
| 51221 | .6198   |
| 51222 | .59934  |
| 51223 | .57297  |
| 51224 | .41975  |
| 51225 | .36177  |

|       |         |
|-------|---------|
| 51231 | .59474  |
| 51232 | .57428  |
| 51233 | .54791  |
| 51234 | .39469  |
| 51235 | .33671  |
| 51241 | .37804  |
| 51242 | .35758  |
| 51243 | .33121  |
| 51244 | .17799  |
| 51245 | .12001  |
| 51251 | .19779  |
| 51252 | .17733  |
| 51253 | .15096  |
| 51254 | -.00226 |
| 51255 | -.06024 |
| 51311 | .63512  |
| 51312 | .61466  |
| 51313 | .58829  |
| 51314 | .43507  |
| 51315 | .37709  |
| 51321 | .61314  |
| 51322 | .59268  |
| 51323 | .56631  |
| 51324 | .41309  |
| 51325 | .35511  |
| 51331 | .58808  |
| 51332 | .56762  |
| 51333 | .54125  |
| 51334 | .38803  |
| 51335 | .33005  |
| 51341 | .37138  |
| 51342 | .35092  |
| 51343 | .32455  |
| 51344 | .17133  |
| 51345 | .11335  |
| 51351 | .19113  |
| 51352 | .17067  |
| 51353 | .1443   |
| 51354 | -.00892 |
| 51355 | -.0669  |
| 51411 | .51802  |
| 51412 | .49756  |
| 51413 | .47119  |

|       |         |
|-------|---------|
| 51414 | .31797  |
| 51415 | .25999  |
| 51421 | .49604  |
| 51422 | .47558  |
| 51423 | .44921  |
| 51424 | .29599  |
| 51425 | .23801  |
| 51431 | .47098  |
| 51432 | .45052  |
| 51433 | .42415  |
| 51434 | .27093  |
| 51435 | .21295  |
| 51441 | .25428  |
| 51442 | .23382  |
| 51443 | .20745  |
| 51444 | .05423  |
| 51445 | -.00375 |
| 51451 | .07403  |
| 51452 | .05357  |
| 51453 | .0272   |
| 51454 | -.12602 |
| 51455 | -.184   |
| 51511 | .43486  |
| 51512 | .4144   |
| 51513 | .38803  |
| 51514 | .23481  |
| 51515 | .17683  |
| 51521 | .41288  |
| 51522 | .39242  |
| 51523 | .36605  |
| 51524 | .21283  |
| 51525 | .15485  |
| 51531 | .38782  |
| 51532 | .36736  |
| 51533 | .34099  |
| 51534 | .18777  |
| 51535 | .12979  |
| 51541 | .17112  |
| 51542 | .15066  |
| 51543 | .12429  |
| 51544 | -.02893 |
| 51545 | -.08691 |
| 51551 | -.00913 |

|       |         |
|-------|---------|
| 51552 | -.02959 |
| 51553 | -.05596 |
| 51554 | -.20918 |
| 51555 | -.26716 |
| 52111 | .63835  |
| 52112 | .61789  |
| 52113 | .59152  |
| 52114 | .4383   |
| 52115 | .38032  |
| 52121 | .61637  |
| 52122 | .59591  |
| 52123 | .56954  |
| 52124 | .41632  |
| 52125 | .35834  |
| 52131 | .59131  |
| 52132 | .57085  |
| 52133 | .54448  |
| 52134 | .39126  |
| 52135 | .33328  |
| 52141 | .37461  |
| 52142 | .35415  |
| 52143 | .32778  |
| 52144 | .17456  |
| 52145 | .11658  |
| 52151 | .19436  |
| 52152 | .1739   |
| 52153 | .14753  |
| 52154 | -.00569 |
| 52155 | -.06367 |
| 52211 | .60522  |
| 52212 | .58476  |
| 52213 | .55839  |
| 52214 | .40517  |
| 52215 | .34719  |
| 52221 | .58324  |
| 52222 | .56278  |
| 52223 | .53641  |
| 52224 | .38319  |
| 52225 | .32521  |
| 52231 | .55818  |
| 52232 | .53772  |
| 52233 | .51135  |
| 52234 | .35813  |

|       |         |
|-------|---------|
| 52235 | .30015  |
| 52241 | .34148  |
| 52242 | .32102  |
| 52243 | .29465  |
| 52244 | .14143  |
| 52245 | .08345  |
| 52251 | .16123  |
| 52252 | .14077  |
| 52253 | .1144   |
| 52254 | -.03882 |
| 52255 | -.0968  |
| 52311 | .59856  |
| 52312 | .5781   |
| 52313 | .55173  |
| 52314 | .39851  |
| 52315 | .34053  |
| 52321 | .57658  |
| 52322 | .55612  |
| 52323 | .52975  |
| 52324 | .37653  |
| 52325 | .31855  |
| 52331 | .55152  |
| 52332 | .53106  |
| 52333 | .50469  |
| 52334 | .35147  |
| 52335 | .29349  |
| 52341 | .33482  |
| 52342 | .31436  |
| 52343 | .28799  |
| 52344 | .13477  |
| 52345 | .07679  |
| 52351 | .15457  |
| 52352 | .13411  |
| 52353 | .10774  |
| 52354 | -.04548 |
| 52355 | -.10346 |
| 52411 | .48146  |
| 52412 | .461    |
| 52413 | .43463  |
| 52414 | .28141  |
| 52415 | .22343  |
| 52421 | .45948  |
| 52422 | .43902  |



|       |         |
|-------|---------|
| 52423 | .41265  |
| 52424 | .25943  |
| 52425 | .20145  |
| 52431 | .43442  |
| 52432 | .41396  |
| 52433 | .38759  |
| 52434 | .23437  |
| 52435 | .17639  |
| 52441 | .21772  |
| 52442 | .19726  |
| 52443 | .17089  |
| 52444 | .01767  |
| 52445 | -.04031 |
| 52451 | .03747  |
| 52452 | .01701  |
| 52453 | -.00936 |
| 52454 | -.16258 |
| 52455 | -.22056 |
| 52511 | .3983   |
| 52512 | .37784  |
| 52513 | .35147  |
| 52514 | .19825  |
| 52515 | .14027  |
| 52521 | .37632  |
| 52522 | .35586  |
| 52523 | .32949  |
| 52524 | .17627  |
| 52525 | .11829  |
| 52531 | .35126  |
| 52532 | .3308   |
| 52533 | .30443  |
| 52534 | .15121  |
| 52535 | .09323  |
| 52541 | .13456  |
| 52542 | .1141   |
| 52543 | .08773  |
| 52544 | -.06549 |
| 52545 | -.12347 |
| 52551 | -.04569 |
| 52552 | -.06615 |
| 52553 | -.09252 |
| 52554 | -.24574 |
| 52555 | -.30372 |

|       |         |
|-------|---------|
| 53111 | .62413  |
| 53112 | .60367  |
| 53113 | .5773   |
| 53114 | .42408  |
| 53115 | .3661   |
| 53121 | .60215  |
| 53122 | .58169  |
| 53123 | .55532  |
| 53124 | .4021   |
| 53125 | .34412  |
| 53131 | .57709  |
| 53132 | .55663  |
| 53133 | .53026  |
| 53134 | .37704  |
| 53135 | .31906  |
| 53141 | .36039  |
| 53142 | .33993  |
| 53143 | .31356  |
| 53144 | .16034  |
| 53145 | .10236  |
| 53151 | .18014  |
| 53152 | .15968  |
| 53153 | .13331  |
| 53154 | -.01991 |
| 53155 | -.07789 |
| 53211 | .591    |
| 53212 | .57054  |
| 53213 | .54417  |
| 53214 | .39095  |
| 53215 | .33297  |
| 53221 | .56902  |
| 53222 | .54856  |
| 53223 | .52219  |
| 53224 | .36897  |
| 53225 | .31099  |
| 53231 | .54396  |
| 53232 | .5235   |
| 53233 | .49713  |
| 53234 | .34391  |
| 53235 | .28593  |
| 53241 | .32726  |
| 53242 | .3068   |
| 53243 | .28043  |

|       |         |
|-------|---------|
| 53244 | .12721  |
| 53245 | .06923  |
| 53251 | .14701  |
| 53252 | .12655  |
| 53253 | .10018  |
| 53254 | -.05304 |
| 53255 | -.11102 |
| 53311 | .58434  |
| 53312 | .56388  |
| 53313 | .53751  |
| 53314 | .38429  |
| 53315 | .32631  |
| 53321 | .56236  |
| 53322 | .5419   |
| 53323 | .51553  |
| 53324 | .36231  |
| 53325 | .30433  |
| 53331 | .5373   |
| 53332 | .51684  |
| 53333 | .49047  |
| 53334 | .33725  |
| 53335 | .27927  |
| 53341 | .3206   |
| 53342 | .30014  |
| 53343 | .27377  |
| 53344 | .12055  |
| 53345 | .06257  |
| 53351 | .14035  |
| 53352 | .11989  |
| 53353 | .09352  |
| 53354 | -.0597  |
| 53355 | -.11768 |
| 53411 | .46724  |
| 53412 | .44678  |
| 53413 | .42041  |
| 53414 | .26719  |
| 53415 | .20921  |
| 53421 | .44526  |
| 53422 | .4248   |
| 53423 | .39843  |
| 53424 | .24521  |
| 53425 | .18723  |
| 53431 | .4202   |

|       |         |
|-------|---------|
| 53432 | .39974  |
| 53433 | .37337  |
| 53434 | .22015  |
| 53435 | .16217  |
| 53441 | .2035   |
| 53442 | .18304  |
| 53443 | .15667  |
| 53444 | .00345  |
| 53445 | -.05453 |
| 53451 | .02325  |
| 53452 | .00279  |
| 53453 | -.02358 |
| 53454 | -.1768  |
| 53455 | -.23478 |
| 53511 | .38408  |
| 53512 | .36362  |
| 53513 | .33725  |
| 53514 | .18403  |
| 53515 | .12605  |
| 53521 | .3621   |
| 53522 | .34164  |
| 53523 | .31527  |
| 53524 | .16205  |
| 53525 | .10407  |
| 53531 | .33704  |
| 53532 | .31658  |
| 53533 | .29021  |
| 53534 | .13699  |
| 53535 | .07901  |
| 53541 | .12034  |
| 53542 | .09988  |
| 53543 | .07351  |
| 53544 | -.07971 |
| 53545 | -.13769 |
| 53551 | -.05991 |
| 53552 | -.08037 |
| 53553 | -.10674 |
| 53554 | -.25996 |
| 53555 | -.31794 |
| 54111 | .50266  |
| 54112 | .4822   |
| 54113 | .45583  |
| 54114 | .30261  |

|       |         |
|-------|---------|
| 54115 | .24463  |
| 54121 | .48068  |
| 54122 | .46022  |
| 54123 | .43385  |
| 54124 | .28063  |
| 54125 | .22265  |
| 54131 | .45562  |
| 54132 | .43516  |
| 54133 | .40879  |
| 54134 | .25557  |
| 54135 | .19759  |
| 54141 | .23892  |
| 54142 | .21846  |
| 54143 | .19209  |
| 54144 | .03887  |
| 54145 | -.01911 |
| 54151 | .05867  |
| 54152 | .03821  |
| 54153 | .01184  |
| 54154 | -.14138 |
| 54155 | -.19936 |
| 54211 | .46953  |
| 54212 | .44907  |
| 54213 | .4227   |
| 54214 | .26948  |
| 54215 | .2115   |
| 54221 | .44755  |
| 54222 | .42709  |
| 54223 | .40072  |
| 54224 | .2475   |
| 54225 | .18952  |
| 54231 | .42249  |
| 54232 | .40203  |
| 54233 | .37566  |
| 54234 | .22244  |
| 54235 | .16446  |
| 54241 | .20579  |
| 54242 | .18533  |
| 54243 | .15896  |
| 54244 | .00574  |
| 54245 | -.05224 |
| 54251 | .02554  |
| 54252 | .00508  |

|       |         |
|-------|---------|
| 54253 | -.02129 |
| 54254 | -.17451 |
| 54255 | -.23249 |
| 54311 | .46287  |
| 54312 | .44241  |
| 54313 | .41604  |
| 54314 | .26282  |
| 54315 | .20484  |
| 54321 | .44089  |
| 54322 | .42043  |
| 54323 | .39406  |
| 54324 | .24084  |
| 54325 | .18286  |
| 54331 | .41583  |
| 54332 | .39537  |
| 54333 | .369    |
| 54334 | .21578  |
| 54335 | .1578   |
| 54341 | .19913  |
| 54342 | .17867  |
| 54343 | .1523   |
| 54344 | -.00092 |
| 54345 | -.0589  |
| 54351 | .01888  |
| 54352 | -.00158 |
| 54353 | -.02795 |
| 54354 | -.18117 |
| 54355 | -.23915 |
| 54411 | .34577  |
| 54412 | .32531  |
| 54413 | .29894  |
| 54414 | .14572  |
| 54415 | .08774  |
| 54421 | .32379  |
| 54422 | .30333  |
| 54423 | .27696  |
| 54424 | .12374  |
| 54425 | .06576  |
| 54431 | .29873  |
| 54432 | .27827  |
| 54433 | .2519   |
| 54434 | .09868  |
| 54435 | .0407   |

|       |         |
|-------|---------|
| 54441 | .08203  |
| 54442 | .06157  |
| 54443 | .0352   |
| 54444 | -.11802 |
| 54445 | -.176   |
| 54451 | -.09822 |
| 54452 | -.11868 |
| 54453 | -.14505 |
| 54454 | -.29827 |
| 54455 | -.35625 |
| 54511 | .26261  |
| 54512 | .24215  |
| 54513 | .21578  |
| 54514 | .06256  |
| 54515 | .00458  |
| 54521 | .24063  |
| 54522 | .22017  |
| 54523 | .1938   |
| 54524 | .04058  |
| 54525 | -.0174  |
| 54531 | .21557  |
| 54532 | .19511  |
| 54533 | .16874  |
| 54534 | .01552  |
| 54535 | -.04246 |
| 54541 | -.00113 |
| 54542 | -.02159 |
| 54543 | -.04796 |
| 54544 | -.20118 |
| 54545 | -.25916 |
| 54551 | -.18138 |
| 54552 | -.20184 |
| 54553 | -.22821 |
| 54554 | -.38143 |
| 54555 | -.43941 |
| 55111 | .41658  |
| 55112 | .39612  |
| 55113 | .36975  |
| 55114 | .21653  |
| 55115 | .15855  |
| 55121 | .3946   |
| 55122 | .37414  |
| 55123 | .34777  |

|       |         |
|-------|---------|
| 55124 | .19455  |
| 55125 | .13657  |
| 55131 | .36954  |
| 55132 | .34908  |
| 55133 | .32271  |
| 55134 | .16949  |
| 55135 | .11151  |
| 55141 | .15284  |
| 55142 | .13238  |
| 55143 | .10601  |
| 55144 | -.04721 |
| 55145 | -.10519 |
| 55151 | -.02741 |
| 55152 | -.04787 |
| 55153 | -.07424 |
| 55154 | -.22746 |
| 55155 | -.28544 |
| 55211 | .38345  |
| 55212 | .36299  |
| 55213 | .33662  |
| 55214 | .1834   |
| 55215 | .12542  |
| 55221 | .36147  |
| 55222 | .34101  |
| 55223 | .31464  |
| 55224 | .16142  |
| 55225 | .10344  |
| 55231 | .33641  |
| 55232 | .31595  |
| 55233 | .28958  |
| 55234 | .13636  |
| 55235 | .07838  |
| 55241 | .11971  |
| 55242 | .09925  |
| 55243 | .07288  |
| 55244 | -.08034 |
| 55245 | -.13832 |
| 55251 | -.06054 |
| 55252 | -.081   |
| 55253 | -.10737 |
| 55254 | -.26059 |
| 55255 | -.31857 |
| 55311 | .37679  |



|       |         |
|-------|---------|
| 55312 | .35633  |
| 55313 | .32996  |
| 55314 | .17674  |
| 55315 | .11876  |
| 55321 | .35481  |
| 55322 | .33435  |
| 55323 | .30798  |
| 55324 | .15476  |
| 55325 | .09678  |
| 55331 | .32975  |
| 55332 | .30929  |
| 55333 | .28292  |
| 55334 | .1297   |
| 55335 | .07172  |
| 55341 | .11305  |
| 55342 | .09259  |
| 55343 | .06622  |
| 55344 | -.087   |
| 55345 | -.14498 |
| 55351 | -.0672  |
| 55352 | -.08766 |
| 55353 | -.11403 |
| 55354 | -.26725 |
| 55355 | -.32523 |
| 55411 | .25969  |
| 55412 | .23923  |
| 55413 | .21286  |
| 55414 | .05964  |
| 55415 | .00166  |
| 55421 | .23771  |
| 55422 | .21725  |
| 55423 | .19088  |
| 55424 | .03766  |
| 55425 | -.02032 |
| 55431 | .21265  |
| 55432 | .19219  |
| 55433 | .16582  |
| 55434 | .0126   |
| 55435 | -.04538 |
| 55441 | -.00405 |
| 55442 | -.02451 |
| 55443 | -.05088 |
| 55444 | -.2041  |

|       |         |
|-------|---------|
| 55445 | -.26208 |
| 55451 | -.1843  |
| 55452 | -.20476 |
| 55453 | -.23113 |
| 55454 | -.38435 |
| 55455 | -.44233 |
| 55511 | .17653  |
| 55512 | .15607  |
| 55513 | .1297   |
| 55514 | -.02352 |
| 55515 | -.0815  |
| 55521 | .15455  |
| 55522 | .13409  |
| 55523 | .10772  |
| 55524 | -.0455  |
| 55525 | -.10348 |
| 55531 | .12949  |
| 55532 | .10903  |
| 55533 | .08266  |
| 55534 | -.07056 |
| 55535 | -.12854 |
| 55541 | -.08721 |
| 55542 | -.10767 |
| 55543 | -.13404 |
| 55544 | -.28726 |
| 55545 | -.34524 |
| 55551 | -.26746 |
| 55552 | -.28792 |
| 55553 | -.31429 |
| 55554 | -.46751 |
| 55555 | -.52549 |
